1     **A primary sensory cortical interareal feedforward inhibitory circuit for**  
2                                   **tacto-visual integration**

3  
4     Simon Weiler<sup>1</sup>, Vahid Rahmati<sup>2</sup>, Marcel Isstas<sup>3</sup>, Johann Wutke<sup>2</sup>, Andreas Walter Stark<sup>4</sup>, Christian  
5     Franke<sup>4,5,6</sup>, Christian Geis<sup>2</sup>, Otto W. Witte<sup>2</sup>, Mark Hübener<sup>7</sup>, Jürgen Bolz<sup>3</sup>, Troy W. Margrie<sup>1a</sup>, Knut  
6                                   Holthoff<sup>2a</sup> and Manuel Teichert<sup>2a\*</sup>

7  
8  
9     <sup>1</sup>Sainsbury Wellcome Centre for Neuronal Circuits and Behaviour, University College London, 25  
10                                   Howland Street, London W1T 4JG, United Kingdom;

11     <sup>2</sup>Jena University Hospital, Department of Neurology, Am Klinikum 1, 07747 Jena, Germany;

12     <sup>3</sup>Friedrich Schiller University Jena, Institute of General Zoology and Animal Physiology, Erbertstraße  
13                                   1, 07743 Jena, Germany;

14     <sup>4</sup>Friedrich Schiller University Jena, Institute of Applied Optics and Biophysics, Fröbelstieg 1, 07743  
15                                   Jena, Germany

16     <sup>5</sup>Friedrich Schiller University Jena, Jena Center for Soft Matter, Philosophenweg 7, 07743 Jena,  
17                                   Germany

18     <sup>5,6</sup>Friedrich Schiller University Jena, Abbe Center of Photonics, Albert-Einstein-Straße 6, 07745 Jena,  
19                                   Germany

20     <sup>7</sup>Max Planck Institute for Biological Intelligence, Am Klopferspitz 18, D-82152 Martinsried, Germany

21

22                                   <sup>a</sup>T.W.M., K.H. and M.T. contribute equally to this work

23

24     **\*Corresponding author:**

25     Name:                   Manuel Teichert

26     Address:               Department of Neurology, Jena University Hospital, 07743 Jena, Germany

27     Telephone number:    0049 03641/325911

28     Facsimile number:    0049 03641/325902

29     Email address:        manuel.teichert@med.uni-jena.de

30 **Abstract**

31 Tactile sensation and vision are often both utilized for the exploration of objects that are within reach  
32 though it is not known whether or how these two distinct sensory systems might combine such  
33 information. Here in mice we find that stimulation of the contralateral whisker array suppresses visually  
34 evoked activity in a subarea of primary visual cortex (VISp) whose visual space covers the whisker  
35 search space. This is mediated by local fast spiking interneurons that receive a direct cortico-cortical  
36 input predominantly from layer 6 of the primary somatosensory barrel cortex (SSp-bfd). These data  
37 demonstrate functional convergence within and between two primary sensory cortical areas for  
38 multisensory object detection and recognition.

39

## 40 **1 Introduction**

41 In everyday life, multiple types of sensory input arriving via distinct sensory modalities are  
42 simultaneously acquired to create a coherent and unified representation of the external world (Ernst and  
43 Banks, 2002; Gielen et al., 1983; Gleiss and Kayser, 2014; Gotz et al., 2017). The ability to rapidly and  
44 correctly recognize an object in the peripersonal space (Rizzolatti et al., 1981), (i.e. within reachable  
45 proximity), crucially relies on the orchestration of the tactile sensation and vision (Ernst and Banks,  
46 2002). In rodents, both whisker based tactile sensation as well as vision are optimally combined to  
47 accurately evaluate the biological significance of nearby objects touched and seen simultaneously  
48 (Nikbakht et al., 2018; Shang et al., 2019). For instance, the performance of rats in judging the  
49 orientation of a solid object in close proximity dramatically increases when whiskers and vision work  
50 in concert (Nikbakht et al., 2018). Moreover, the interaction of these modalities is critically involved in  
51 prey capture-behavior in mice (Shang et al., 2019). Importantly, given that rodent's whiskers are located  
52 in front of, or centered about their eyes (Huet and Hartmann, 2014), it is likely that both modalities  
53 operate within the same external space during object exploration. Thus, whisker-mediated tactile  
54 sensation and vision are deeply bound at the behavioral level and seemingly at the level of external  
55 sensory space.

56  
57 In this study, we have used a combination of stereo photogrammetry for 3-dimensional (3D)  
58 reconstruction of the whisker array, intrinsic signal imaging, brain-wide viral retrograde and anterograde  
59 transsynaptic tracing followed by serial two-photon tomography and deep-learning based 3D detection  
60 of labeled cells, electrophysiology, optogenetics and mathematical network modeling to explore the  
61 possibility of tacto-visual convergence in the external proximity space and within the circuitry of the  
62 mouse VISp. We find that the search space of whiskers is highly associated with the visual space covered  
63 by VISp. Strikingly, this spatial multisensory convergence is precisely reflected in a subarea within  
64 VISp. Here, the anatomical location of postsynaptic excitatory neurons receiving direct cortico-cortical  
65 input from SSp-bfd, corresponds to the area in the visual space that overlaps with the external whisker  
66 search space. We further find that whisker stimulation has a powerful regulatory influence on VISp such  
67 that it cross-modally suppresses visually driven responses via fast-spiking interneuron mediated  
68 feedforward inhibition in layer 2/3. Our data reveal a specific anatomical and functional tacto-visual  
69 convergence at the level of VISp, highlighting the role of primary sensory areas in multisensory  
70 integration.

## 71 **2 Results**

### 72 **Mouse whiskers are prominently located in the visual space covered by VISp**

73 As mouse's whiskers are located in front of their eyes, we first aimed to explore to what extent they are  
74 associated with the external visual space covered by VISp. Because the 3D morphology of the mouse  
75 whisker array is unknown, we generated a morphologically accurate 3D model of this array based on  
76 stereo photogrammetry (Heist et al., 2018) data and aligned it with a realistic 3D model of the mouse  
77 head, including the eyes (Bolanos et al., 2021) (**Figures 1A, 1B, S1A-S1D**). Onto this model we then  
78 constructed the 3D visual space covered by VISp (Zhuang et al., 2017) (**Figure 1C**). Interestingly,  
79 already in this static model with whiskers and eyes in their intermediate positions, both whiskers and  
80 visual space show a market spatial overlap (**Video 1, Figure 1C**).

81  
82 Mice typically gather sensory information by actively moving their sensory organs. More specifically,  
83 whiskers are rhythmically moved backward (retraction) and forward (protraction) during environmental  
84 exploration (Petersen, 2014). Additionally, mice move their eyes within an average  $\pm 20$  degree range  
85 around their central position (Meyer et al., 2020; Michael et al., 2020). Consequently, this shifts the  
86 visual space covered by VISp with respect to the location of the whisker-tips. To investigate the dynamic  
87 association of the actively scanned whisker and visual space, we simulated both whisker and eye  
88 movements (**Video 2, Figures S1H, S1I**, see methods). For quantification, we determined the average  
89 elevation and azimuth coordinates of the tip of each whisker on the left side of the snout, under retraction  
90 ( $-40^\circ$ ), intermediate ( $0^\circ$ ) and protraction ( $+40^\circ$ ) conditions in a left eye-centered spherical coordinate  
91 system (**Figures S1E-S1G**).

92  
93 In all these conditions a substantial percentage of whisker-tips was present within the visual space  
94 (**Figure 1D**). Remarkably, while over the course of whisker protraction – a movement often associated  
95 with object exploration (Sofroniew and Svoboda, 2015) - the spread of the whisker array decreased (see  
96 also (Grant et al., 2009)), the number of whisker tips within visual space significantly increased from  
97  $\sim 40\%$  to  $\sim 80\%$  (**Figures 1D, 1E**). Thereby, whisker tips accumulated in the lower, nasal visual space  
98 (**Figure 1D**). This implies, that mice can actively bring their tactile and (lower nasal) visual space into  
99 registration to operate within the same coordinate system. Thus, our data suggest that mice usually sense  
100 tactile and visual cues in proximity space in a spatially coherent fashion.

101

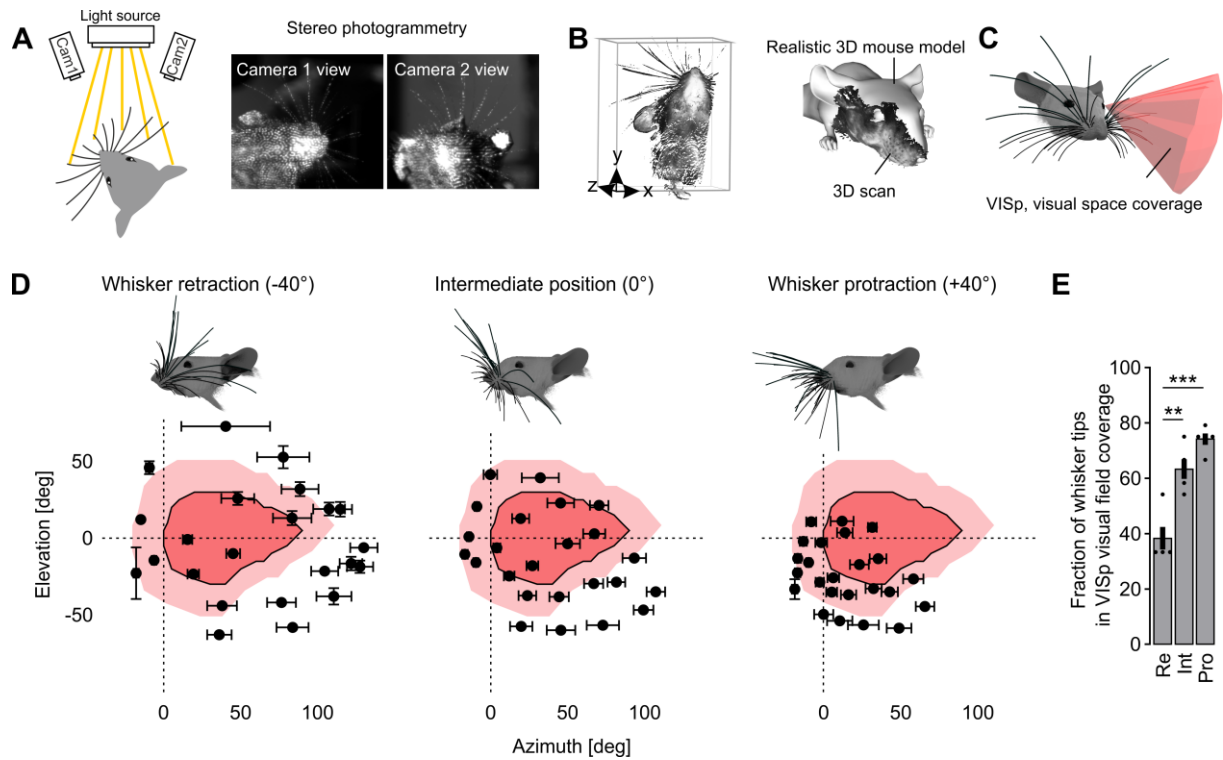

102

103 **Figure 1: Tacto-visual overlap in the mouse proximity space.** (A) The mouse head including the whisker array was  
 104 illuminated with structured light patterns and stereo images were taken by two cameras. Detection of corresponding point pairs  
 105 then allowed 3D-reconstruction via triangulation. (B) Left, Representative 3D point cloud of the mouse head with whiskers  
 106 obtained after 3D-reconstruction. Right, Obtained 3D point clouds were aligned to an existing realistic 3D mouse model from  
 107 (Bolanos et al., 2021). (C) 3D reconstructed and morphologically accurate model of the mouse head including eyes and  
 108 whiskers (constructed in blender, see methods). Additionally, the 3D visual space covered by VISp originating from the left  
 109 eye was constructed according to (Zhuang et al., 2017). (D) Mapping of tacto-visual overlap along azimuth and elevation. Dark  
 110 pink area with surrounding solid black line: Coverage map of visual space by VISp (Zhuang et al., 2017). Bright pink area:  
 111 Coverage map of visual space covered by VISp and mapped by eye movements in a  $\pm 20$  degree range. Centroids  $\pm$  s.e.m.  
 112 represent mean whisker tip positions under simulated retraction, intermediate and protraction conditions (n=5 mice). Mouse  
 113 heads with whiskers display examples for whisker retraction, their intermediate position and whisker protraction (-40°, 0°,  
 114 +40°). (E) Fraction of whisker tips located within the visual space covered by VISp under eye movement conditions during  
 115 whisker retraction (Re), intermediate position (Int) and protraction (Pro). Black circles indicate data points of individual mice  
 116 (Re vs. Int,  $p=0.0012$ ; Re vs. Pro,  $p=0.0047$ ; paired t-tests followed by Bonferroni correction) and bars indicate the mean  
 117 fraction of whisker tips on total number of whiskers (the 24 large whiskers)  $\pm$  s.e.m. \*\* $p<0.01$ , \*\*\* $p<0.01$

118

119

120 **Whisker stimulation suppresses visually driven activity in VISp *in vivo***

121 Having found that whiskers are prominently located in visual space, we wondered whether tactile  
122 sensation affects visual processing in VISp. Therefore, we explored the functional effects of tactile  
123 whisker stimulation on VISp activity using periodic intrinsic signal imaging (Kalatsky and Stryker,  
124 2003). We measured visually driven VISp responses in restrained mice in the absence and presence of  
125 simultaneous whisker stimulation. The visual stimulus (v) was a vertically moving horizontal light bar  
126 displayed on a monitor in the nasal visual field of the left eye while whisker stimulation (w) was  
127 achieved by a vibrating metal pole moving continuously through the left whisker array, row by row.  
128 Independent stimulations evoked robust cortical activity and provided topographic maps of VISp and  
129 SSp-bfd, respectively (**Figures S2A, S2B**).

130  
131 Remarkably, concurrent presentation of these stimuli significantly reduced the amplitude of visually  
132 driven VISp activity (**Figures 2A-2C**), suggesting a cross-modal modulation of VISp responses by  
133 tactile stimuli. Conversely, SSp-bfd responses remained unaffected by multisensory stimulation  
134 (**Figures S2C-S2E**), indicating an asymmetrical cross-modal effect. Next, concurrently with the visual  
135 stimulus we aimed to stimulate all whiskers on one side simultaneously. For this, we used air puffs  
136 generated by a picospritzer (**Figure 2D**). Interestingly, this stimulation led to an even stronger  
137 attenuation of visually elicited VISp responses (**Figures 2D', S2K**), whereas ipsilateral whisker  
138 stimulation had no effect (**Figure S2J**).

139  
140 We performed several control experiments to check for possible artifacts: (1) In whisker deprived (WD)  
141 mice, presenting the metal pole during visual stimulation did not lead to visual disturbances (**Figures**  
142 **S2F, S2F'**). (2) Likewise, air puffs also did not alter visually evoked activity in VISp in WD mice,  
143 indicating that sounds associated with the puffs did not contribute to the effect observed (**Figures S2G,**  
144 **S2G'**). (3) After eliminating the afferent input from the whiskers by cutting the infraorbital nerve (ION),  
145 whisker stimulation by air puffs had no effect on visual responses in VISp anymore, in contrast to sham  
146 surgery conditions (**Figures S2H, S2I**), indicating that that whiskers moving through visual space do  
147 not suppress VISp activity. Collectively, our data indicate a unihemispheric tacto-visual convergence at  
148 the level of VISp whereby tactile inputs act to globally suppress visually driven responses.

149  
150 To investigate the effects of whisker stimulation on VISp activity in freely moving animals, we next  
151 used functional neuroanatomy to examine unrestrained mice after they were exposed to an enriched  
152 environment (**Figure 2E**, right). Two groups of mice were used, a control group with intact whiskers  
153 and an experimental WD group (**Figure 2E**, left). Thus, voluntary locomotion through the provided  
154 environment led to bimodal visual and whisker stimulation (v+w) in control, but visual stimulation alone  
155 (v only) in WD mice. We quantified neuronal activation in VISp and SSp-bfd using the expression of  
156 the immediate-early gene c-fos. As expected, the number of c-fos positive neurons in SSp-bfd was

157 markedly higher in control compared to WD mice (**Figure 2F**). Strikingly, the opposite effect was  
158 observed in VISp, where we detected significantly less *c-fos* labeled neurons in control compared to  
159 WD mice (**Figure 2G**). Hence, we conclude that also in unrestraint mice visual responses in VISp are  
160 reduced by concurrent whisker stimulation. Because about 80% of all cortical neurons are excitatory,  
161 this effect can predominantly be attributed to a reduced responsiveness of these neurons in VISp. To  
162 address the contribution of inhibitory GABAergic neurons separately we specifically determined *c-fos*  
163 expression in parvalbumin (PV) and somatostatin (SST) positive cells. Both, PV and SST expressing  
164 inhibitory neurons showed significantly higher *c-fos* expression-levels in control mice (**Figures 2H, 2I**)  
165 indicating that whisker stimulation cross-modally drives local inhibitory circuits in VISp.  
166

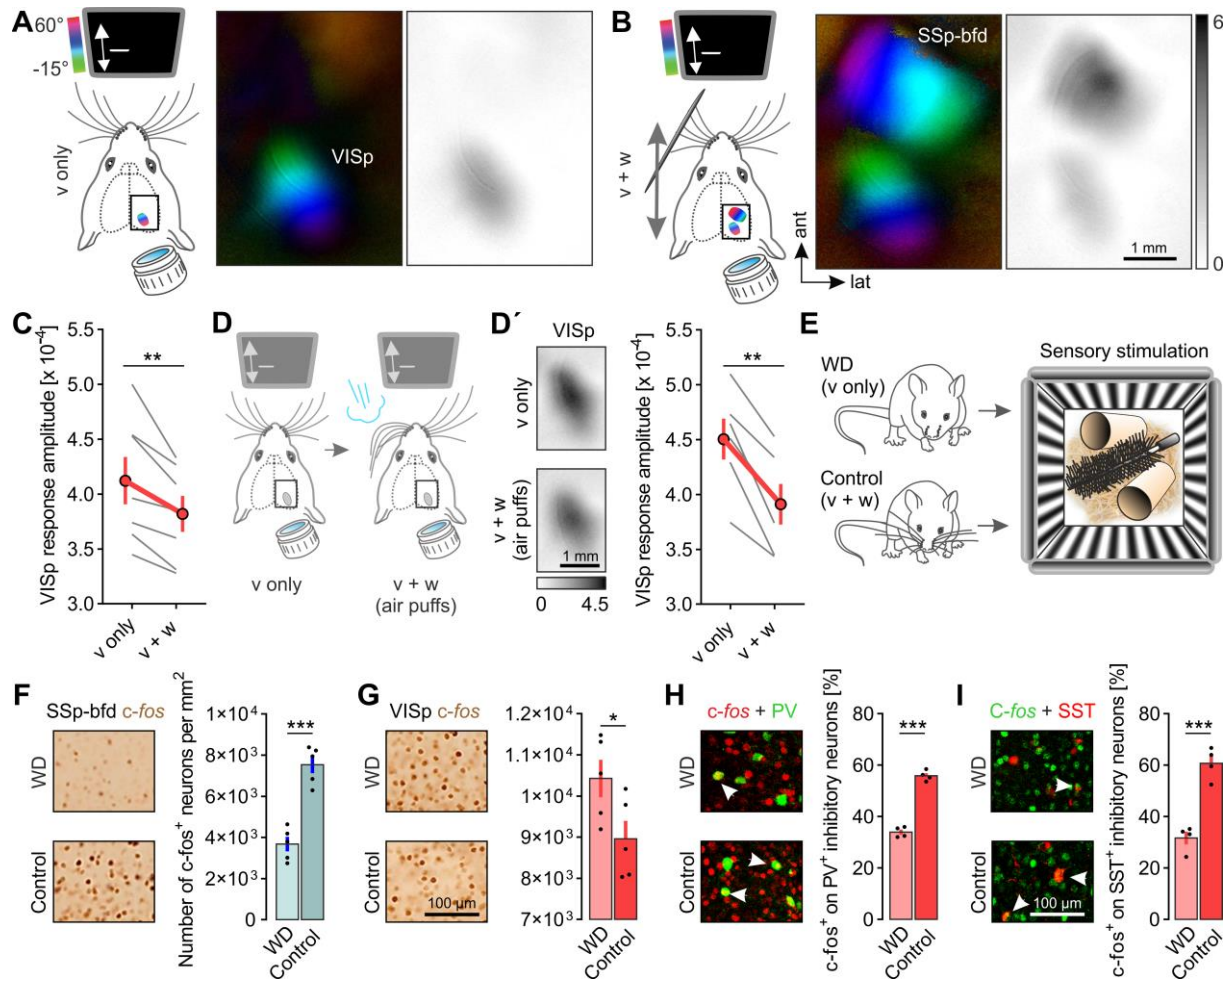

167

168 **Figure 2: Whisker stimulation suppresses visually driven activity in VISp in vivo.** (A, B) Schematics of unimodal visual  
 169 (v only) and bimodal visual and whisker (v+w) stimulation procedures together with topographic and grey-scaled amplitude  
 170 maps of VISp and SSp-bfd of one exemplary mouse. Darker amplitude maps indicate higher sensory evoked cortical activity.  
 171 For bimodal stimulation both stimuli were temporally synchronized and spatially aligned. (C) Quantification of VISp response  
 172 amplitudes under v only and v+w conditions (n=7, p=0.0067; paired t-test). (D) Schematic of the unimodal visual (v only)  
 173 stimulation procedure and the bimodal visual and air puff induced whisker stimulation (v+w (air puffs)) procedure. (D') Left,  
 174 Grey-scaled amplitude maps of VISp obtained after unimodal and bimodal stimulation. Right, Quantification of VISp response  
 175 amplitudes under v only and v+w conditions (n=6, p=0.0017; paired t-test). (E) Schematic of procedures preceding c-fos  
 176 immunohistochemistry. Awake control mice and whisker deprived (WD) mice were placed in an environment for multisensory  
 177 stimulation. The chamber consisted of four monitors displaying moving sine-wave gratings for visual stimulation. The bottom  
 178 of the chamber was equipped with multiple densely arranged obstacles such as nesting material, paper roles and brushes  
 179 enforcing simultaneous whisker stimulation during voluntary locomotion. (F) Left, Representative images of c-fos expression  
 180 in SSp-bfd in WD and control mice after their exposure to the enriched environment. Right, quantified density of c-fos labeled  
 181 neurons in SSp-bfd (n=5 mice per group, p=0.0001; unpaired t-test). (G) Left, representative images of c-fos expression in  
 182 VISp in WD and control mice after their exposure to the same environment. Right, quantified density of c-fos labeled  
 183 neurons in VISp (n=5 mice per group, p=0.0490, unpaired t-test). (H, I) Left, representative images of double immunostainings against  
 184 c-fos and either PV or SST positive interneurons in VISp in WD and control mice after their exposure to the same environment.  
 185 Right, quantified percentage of PV or SOM positive interneurons double labeled with c-fos on the total number of PV or SOM  
 186 positive interneurons (n=4 mice per group, p=0.0000, p=0.0000; unpaired t-test). In C,D: Grey lines connect measurements of  
 187 individual mice and red lines represent means  $\pm$  s.e.m. In F-I: Black circles indicate measurements of individual mice and bars  
 188 represents means  $\pm$  s.e.m. \*p<0.05, \*\*p<0.01, \*\*\*p<0.01

189



190 **Layer 6 excitatory neurons in SSp-bfd are the main source for direct projections to VISp**

191 Next, we aimed to identify the pathway underlying tactile integration in VISp since the source of  
192 whisker-related inputs in VISp is unknown. To systematically identify neurons projecting to VISp, we  
193 utilized retrograde tracing using a self-engineered recombinant AAV variant, AAV-EF1a-H2B-EGFP,  
194 which leads to the expression of EGFP in the nuclei of projection neurons (nuclear retro-AAV). This  
195 virus was injected into different positions across the extent of VISp, whereby each mouse received one  
196 injection extending across all cortical layers (**Figures 3A, 3B, 3I**). Following brain-wide *ex vivo* two-  
197 photon tomography, retrogradely labeled neurons across the entire brain were counted using a deep  
198 learning based algorithm for 3D cell detection (Tyson et al., 2021) and assigned to brain areas of the  
199 Allen Mouse Brain Common Coordinate Framework (CCFv3) (Wang et al., 2020) (**Figure S3B**).

200

201 We found that VISp receives projections from a large number of ipsilateral cortical and subcortical brain  
202 areas (**Figure S3A**). Importantly, when focusing on somatosensory brain areas, projection neurons were  
203 particularly abundant in the whisker-recipient SSp-bfd, while subcortical whisker-recipient areas only  
204 contained a negligible number of them (**Figures 3C, 3D, S3C**). Similar results were obtained when we  
205 injected another AAV-based retrograde tracer, rAAV2-retro.CAG.GFP that permits efficient access to  
206 cell bodies of projection neurons (cellular retro-AAV) (Tervo et al., 2016) (**Figure S3D**). Together, our  
207 data indicate that SSp-bfd is the major source for direct connections to VISp. Thus, this pathway is a  
208 promising candidate to directly mediate the functional effects of whisker stimulation on visually driven  
209 activity in VISp as observed above.

210

211 Within SSp-bfd and other subareas of SSp the dominant location of projection neurons was layer 6 (L6)  
212 followed by L2/3 (**Figures 3E, 3F**). Likewise, also in the primary auditory cortical area (AUDp), which  
213 has been shown to send direct functional connections to VISp (Ibrahim et al., 2016; Iurilli et al., 2012),  
214 L6 contained a substantial fraction of projection neurons as well, beside smaller fractions in L2/3 and 5  
215 (**Figures S3G, S3H**). Importantly, L6 projection neurons in SSp-bfd were excitatory and non-  
216 overlapping with cortico-thalamic (CT) cells, the main cell type in L6 (Zhang and Deschenes, 1997), as  
217 revealed by virus injections in GAD-tdTomato or Ntsr1-tdTomato mice (Bortone et al., 2014),  
218 expressing tdTomato in GABAergic and CT neurons, respectively (**Figures 3G, 3H**). Projection neurons  
219 in L2/3 did also not co-express GAD-tdTomato (data not shown). Taken together, these data indicate  
220 that the location of projection neurons in L6 is a general feature of cross-modal cortico-cortical  
221 communication and that L6 cells projecting from SSp-bfd to VISp are cortico-cortical (CC) projection  
222 neurons.

223

224 We next asked whether there was any spatial organization of L6 and L2/3 projection neurons across  
225 SSp-bfd. Interestingly, independent of the different locations of the injection sites within VISp (**Figure**  
226 **3I**), the highest density of projection neurons in both layers was observed in the posterior region of SSp-

227 bfd, the part of SSp-bfd situated in close proximity to VISp (**Figures 3J-3M, S3J, S3L, S3M**).

228 Projection neurons in both layers were not obviously organized topographically (**Figure S3K**).

229

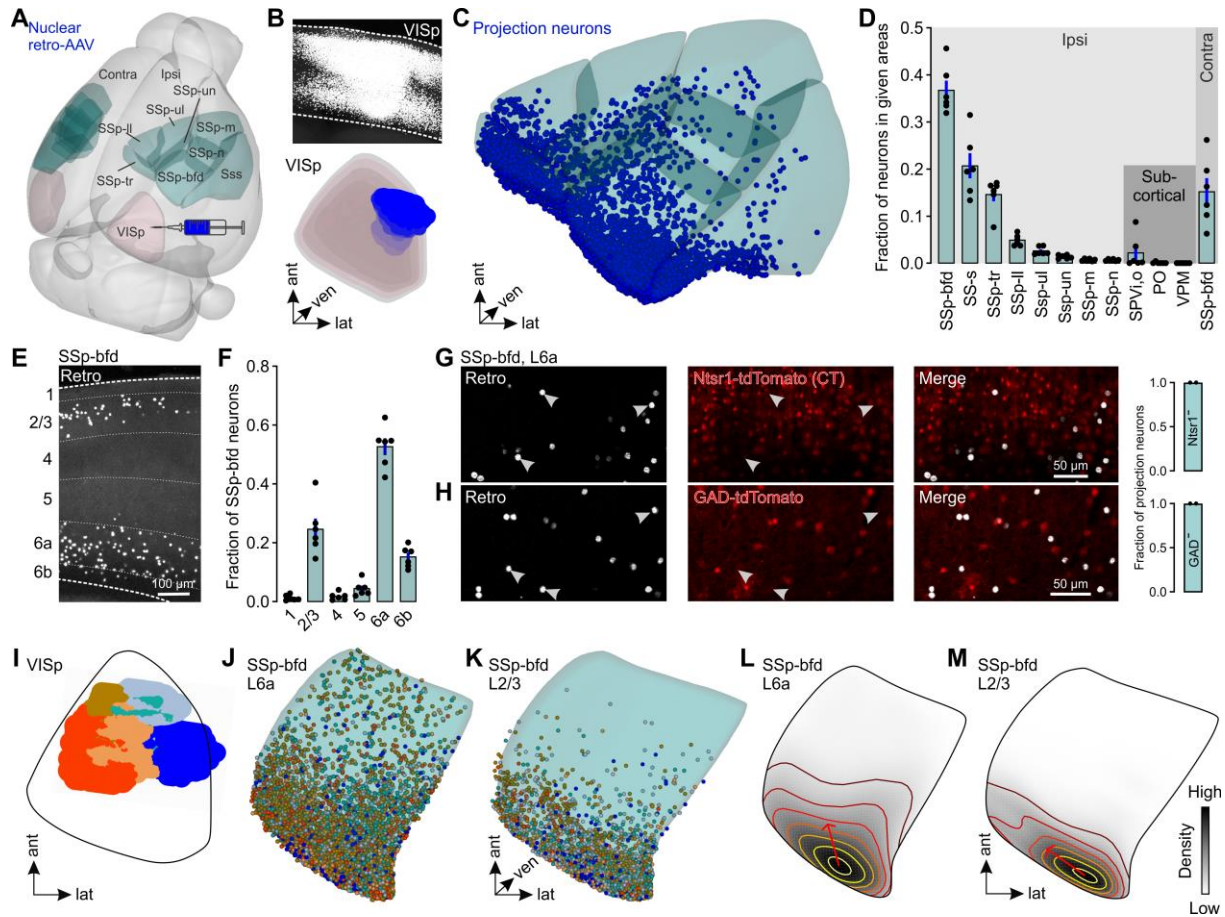

230

231 **Figure 3: Excitatory cortico-cortical (CC) neurons in L6 in SSp-bfd are the main source for direct projections to VISp.**  
 232 (A) 3D rendered mouse brain showing the locations of the somatosensory cortical areas and VISp together with a schematic of  
 233 the viral injection approach. (B) Top, coronal section showing a representative injection site in VISp. Bottom, 3D reconstruction  
 234 of the same injection site warped into the 3D rendered space of VISp of the CCFv3 (Wang et al., 2020). (C) Visualization of  
 235 detected projection neurons of the same mouse warped into the 3D rendered space of cortical somatosensory areas of the  
 236 CCFv3. (D) Fraction of projection neurons in different cortical somatosensory areas and whisker-recipient subcortical areas  
 237 (n=6). Black circles represent fractional cell counts of individual animals. Bars represent means  $\pm$  s.e.m. (similar across all plots). (E) Representative coronal section showing projection neurons (white) in SSp-bfd. Numbers indicate cortical layers. (F)  
 239 Fraction of projection neurons across different layers of SSp-bfd (n=6). (G, H) Coronal sections showing tdTomato expression and retrogradely labeled neurons in L6 in SSp-bfd of Ntsr1 and GAD-tdTomato mice (n=2 mice per group). (I) Reconstructed  
 241 injection sites from 6 different mice warped to a horizontal projection of VISp. (J, K) Dorsal view to L6a and L2/3 of SSp-bfd.  
 242 Detected projection neurons from the 6 different mice warped to L6a and L2/3 of SSp-bfd of the CCFv3. Colors relate to the  
 243 injection sites in (I). (L, M) Average density of projection neurons in L6a and L2/3 of SSp-bfd (horizontal projection). The  
 244 colors of the contour lines indicate cell density (yellow: high, dark brown: low). Closer distances between two contour lines  
 245 reflect a steeper slope of density changes. The red arrows indicate the direction of the first principal component (PC) explaining  
 246 the largest variance in the distribution of projection neurons (n=6).

247

248 **Projection neurons in SSp-bfd are located in the posterior barrel columns, which correspond to**  
249 **the most caudal whiskers**

250 In rodents, SSp-bfd contains discrete clusters of neurons in L4, called “barrels” which are arranged  
251 somatotopically in an identical pattern as the whiskers on the snout (Van der Loos and Woolsey, 1973).  
252 Thereby, each whisker preferentially innervates one barrel and its cortical column (Petersen, 2019).  
253 Here, we investigated the association of neurons projecting to VISp with these barrel columns. For this,  
254 we first reconstructed the entire barrel field in layer 4 from an average autofluorescence image data set  
255 obtained by serial two-photon tomography of 1675 mouse brains (Wang et al., 2020), using the brainreg-  
256 segment software (Tyson et al., 2022) (**Figures 4A-4D**). Next, to generate a map of the barrel columns  
257 in L6 and L2/3 of SSp-bfd, the reconstructed barrel field was scaled into these layers.

258  
259 **Figures 4E and 4F** illustrate an overlay of the barrel-columns with the projection neurons labeled by  
260 the different injection sites in VISp. Generally, projection neurons in both L6 and L2/3 were detected  
261 within the barrel columns and their separating septa. As expected, we identified specifically the posterior  
262 barrel columns to contain a significant amount of neurons, which was beyond chance levels, in both  
263 layers, compared to a modeled uniform distribution of projections neurons across SSp-bfd (**Figure 4G**).  
264 These posterior columns are preferentially innervated by the most caudal whiskers (**Figure 4H**). This  
265 suggests, that somatosensory information, particularly gathered in the space scanned by the caudal  
266 whiskers, plays a crucial role in multisensory tactile integration in VISp.

267

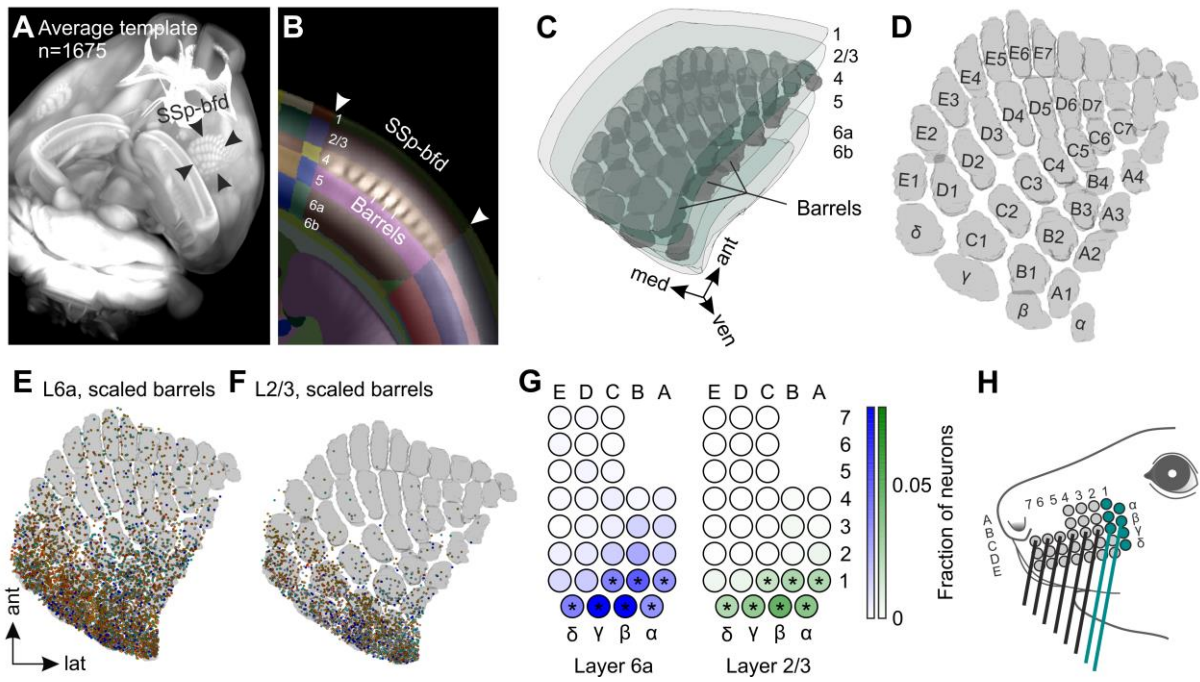

268

269 **Figure 4: Projection neurons in caudal barrel columns innervated by caudal whiskers are the main source for direct**  
 270 **projections to VISp.** (A) Mouse brain reconstructed in 3D from an autofluorescence image data set obtained by serial two  
 271 photon tomography of 1675 mouse brains (Wang et al., 2020). (B) The autofluorescence imaging data set was aligned to  
 272 theCCFv3 (Wang et al., 2020) using the brainreg software (Tyson et al., 2022). Barrels became visible in L4 of SSp-bfd.  
 273 Numbers indicate cortical layers. (C) Barrels in L4 were reconstructed in 3D using brainreg-segment (Tyson et al., 2022)  
 274 and warped to the 3D rendered space of SSp-bfd of the CCFv3 (Wang et al., 2020). (D) Horizontal projection of the reconstructed  
 275 barrels together with the standard nomenclature for rows (A-E) and arcs (1-7). (E, F) Overlay of projection neurons labeled by  
 276 the 6 different injections sites in VISp with reconstructed barrel field scaled in L6 and L2/3 of SSp-bfd (horizontal projections).  
 277 (G) Color-coded output maps showing relative average output strength of individual barrel columns in L6 and L2/3 in SSp-bfd  
 278 (n=6). Asterisks indicate barrel columns containing a significant number of projection neurons as compared to uniformly  
 279 distributed cell positions (\*p<0.001). Values are normalized to the total number of neurons within all barrel columns in both  
 280 L6a and L2/3. (H) Schematic of the mouse mystacial pad. Circles indicate whisker basepoints. Colored whiskers represent the  
 281 ones predominantly innervating the barrel columns in SSp-bfd with strong significant projections to VISp.

282 **Locations of postsynaptic neurons in VISp correspond to the lower lateral visual field**

283 Given the observed anatomical projections from SSp-bfd to VISp, we next aimed to explore the precise  
284 location and spatial distribution of postsynaptic neurons in VISp. For this, we utilized AAV-mediated  
285 anterograde trans-synaptic tracing in which the injection of a virus containing Cre-recombinase  
286 (AAV2/1-hSyn-Cre) in the presynaptic neuronal population induces the conditional expression of a  
287 reporter gene in postsynaptic neurons (Zingg et al., 2017). We injected this virus into different positions  
288 spanning the extent of SSp-bfd in Ai14 mice (**Figures 5A, 5B**).

289  
290 We found postsynaptic neurons in multiple cortical and subcortical areas, known to be directly targeted  
291 by SSp-bfd (Petersen, 2019) (**Figures S4A, S4B**). Strikingly, labeled neurons were also abundant in  
292 visual cortical areas including higher-order visual areas (HVAs) and VISp (**Figures 5C, 5D, and S4D**).  
293 In contrast, we only detected a negligible number of postsynaptic neurons in subcortical visual areas  
294 (**Figure 5D**). In line with our observations made by retrograde tracing experiments, these data suggest  
295 that tactile integration in mouse visual cortex is substantially mediated by direct cortico-cortical  
296 connections originating in SSp-bfd.

297  
298 We found that postsynaptic neurons in HVAs and VISp were preferentially located in L2/3 (**Figures**  
299 **5E, S4D**), whereas postsynaptic neurons in AUDp were predominantly found in L5 and 6 (**Figures S4E-**  
300 **S4F**). This strongly suggests that L2/3 plays an important role for cross-modal integration of tactile  
301 inputs within visual areas. Our retrograde tracing results suggest that whisker-related tactile inputs in  
302 VISp originate in L6 and L2/3 of SSp-bfd. To investigate which cortical layers in VISp are targeted by  
303 these specific projection sources, we injected the anterograde tracer specifically into L6 or L2/3 in SSp-  
304 bfd (**Figures S4H, S4I**). Strikingly, the vast majority of postsynaptic neurons in VISp was found after  
305 L6 injections (**Figure S4I, left**). These neurons were predominantly located in L2/3 (and L5, **Figure**  
306 **S4I, right**) suggesting that the direct pathway from L6 in SSp-bfd to L2/3 in VISp is critically involved  
307 in mediating the effects of whisker stimulation on VISp responses.

308  
309 Within VISp postsynaptic neurons were not obviously topographically arranged and had the highest  
310 density in the anterior part of VISp (**Figures 5G, 5H, S4J, S4K**), independent of the injection positions  
311 within SSp-bfd (**Figure 5F**). Accordingly, PCA-based parcellation of VISp revealed a steep gradient in  
312 the number of postsynaptic neurons in anterior-posterior direction (**Figures S4L, S4M**). These data  
313 indicate that SSp-bfd mediated tacto-visual convergence is restricted to a transitional zone in the anterior  
314 part of VISp located in close proximity to SSp-bfd.

315  
316 Finally, we examined the association between the location of postsynaptic neurons and the functional  
317 spatial organization of VISp. In detail, VISp contains a continuous representation of the contralateral  
318 visual field (Drager, 1975; Wagor et al., 1980). The lower visual field is represented in the anterior part

319 (elevation), and the nasal visual field innervates the lateral part of VISp (azimuth) (Drager, 1975; Garrett  
320 et al., 2014; Wagor et al., 1980; Zhuang et al., 2017). To investigate the association of postsynaptic  
321 neurons with the visual field representations, we first parceled VISp into 31 subareas, based on non-  
322 arbitrary sectioning along the first and second principal component (PC) of the postsynaptic neuron  
323 distribution, and determined the average fraction of labeled neurons in each of these subareas (**Figure**  
324 **5I**). Then, we assigned visual space coordinates (Zhuang et al., 2017) (**Figures S4N, S4O**) to each  
325 subarea to estimate its visual space coverage. Remarkably, we found that subareas with high cell counts  
326 represent the lower, nasal visual space (**Figure 5J**), reminiscent of the search space of whiskers under  
327 protraction conditions. This implies that visual signals predominantly from this part of visual space are  
328 suppressed by SSp-bfd inputs.  
329

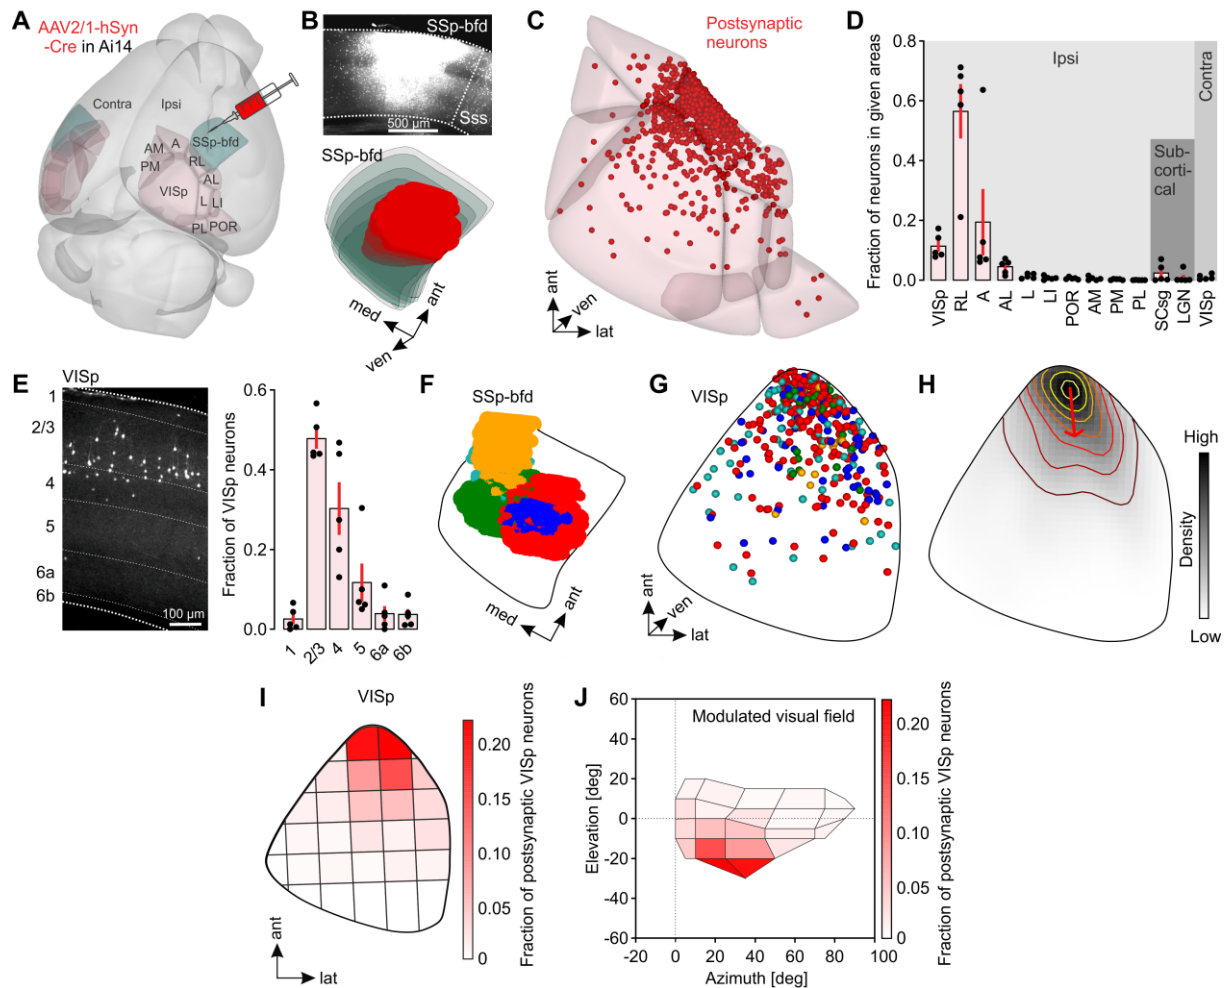

330

331 **Figure 5: Target neurons in VISp are mainly located in L2/3 and their location in elevation and azimuth corresponds**  
 332 **to the lower, nasal visual field.** (A) 3D-rendered mouse brain showing the locations of SSp-bfd and visual cortex areas together  
 333 with a schematic of the viral injection approach. (B) Top, coronal section showing a representative injection site in SSp-bfd.  
 334 Bottom, 3D reconstruction of the same injection site warped into the 3D rendered space of SSp-bfd of the CCFv3 (Wang et al.,  
 335 2020). (C) Visualization of detected postsynaptic neurons of one representative mouse warped to cortical somatosensory areas  
 336 of the CCFv3 of visual cortex areas. (D) Fraction of postsynaptic neurons in different cortical and subcortical visual areas  
 337 (n=5). Black circles represent fractional cell counts of individual animals. Bars represent means  $\pm$  s.e.m. (similar across all plots). (E) Left, representative coronal image showing postsynaptic neurons (white) in VISp. Numbers indicate cortical layers.  
 338 Right, fraction of postsynaptic neurons across different layers of VISp (n=5). (F) 3D-reconstructed injection sites from 5  
 339 different mice warped to a horizontal 2D projection of SSp-bfd. (G) Detected postsynaptic neurons from 5 different mice  
 340 warped to VISp of the CCFv3 (horizontal projection). (H) Average density of projection neurons in VISp (horizontal projection,  
 341 n=5). Contour lines indicate the slope of density changes and the red arrow indicates the first principal component explaining  
 342 the largest variance in the distribution of postsynaptic neurons (n=5 mice). (I) Horizontal projection of VISp. Parcellation was  
 343 performed based on PCA of the postsynaptic neuron distribution. The color-coded map shows the average fraction of  
 344 postsynaptic neurons (n=5 mice) in each parcel. (J) Visual space covered by the detected postsynaptic neurons in VISp. Color-  
 345 coded is the average fraction of postsynaptic neurons (n=5 mice) in each parcel of VISp.

347

348



### 349 **SSp-bfd functionally targets VISp**

350 Given the prominent cross-modal projections from SSp-bfd to VISp, we sought to delineate the  
351 functional strength and specificity underlying these anatomical connections. For this, we injected the  
352 SSp-bfd with AAV.CaMKIIa-hChR2 tagged with EYFP to express light sensitive cation channels in  
353 excitatory cells (**Figure 6A**). Additionally, we co-injected AAV.Syn.Cre to anterogradely label potential  
354 postsynaptic targets in VISp of Ai14 mice. With this approach, we observed both axonal fibers  
355 expressing ChR2 and anterogradely labelled cells with the highest density in the anterior part of VISp  
356 similar to our previous observations (see **Figures 5 and 6B**). We then used whole-cell patch clamp  
357 recordings to measure optically evoked postsynaptic currents or potentials (PSCs or PSPs) of L2/3 cells  
358 in acute brain slices of VISp.

359

360 We first recorded from pyramidally-shaped tdtomato<sup>+</sup> and neighbouring tdtomato<sup>-</sup> neurons in L2/3 (PNs,  
361 less than 100  $\mu$ m apart, **Figures 6B, S5A**). We observed both light-evoked excitatory and inhibitory  
362 PSCs in the same cells (**Figure 6C**). Given that the strength and latencies of light-evoked PSCs in  
363 tdtomato<sup>+</sup> and tdtomato<sup>-</sup> negative cells were indistinguishable, we pooled these data together for the  
364 remaining analysis (**Figures S5B, S5C**). While the onset latencies of EPSCs measured in L2/3 PNs were  
365 within the range of monosynaptic connections (**Figure 6C**), IPSCs were significantly delayed compared  
366 to the EPSCs in the same cells indicating disynaptic inhibition (**Figure 6D**). Indeed, the IPSCs  
367 disappeared while the EPSCs persisted after washing in TTX and 4-AP (**Figure 6E**). These observations  
368 strongly suggest that excitatory inputs from SSp-bfd drive disynaptic local inhibition onto L2/3 PNs in  
369 VISp.

370

371 Given the importance of the precise excitation and inhibition balance in sensory perception (Kirkwood,  
372 2015) and its circuit-specific variation, we evaluated the cross-modally evoked E/I balance in L2/3 PNs  
373 in VISp. We found that the synaptic input to L2/3 PNs was dominated by the delayed inhibition under  
374 different stimulation frequencies and durations, which was reflected in the cell-by cell E/I ratio (**Figures**  
375 **6F, 6G**). Taken together, SSp-bfd directly functionally targets and is able to inhibit L2/3 PNs in VISp.

376

### 377 **SSp-bfd mediates feedforward inhibition via local fast spiking inhibitory neurons in layer 2/3 in** 378 **VISp**

379 To determine the source of the inhibition evoked via SSp-bfd activation, we compared the functional  
380 connectivity between SSp-bfd and L2/3 GABAergic as well as excitatory L2/3 neurons in VISp. For  
381 this, we injected AAV.CaMKIIa-hChR2-EYFP in SSp-bfd in GAD/tdtomato transgenic mice to  
382 specifically measure cross-modal input to PNs and Interneurons (INs, **Figure 6H**). Moreover, we  
383 followed a similar injection approach in PV/tdtomato transgenic mice to gain further subtype input  
384 specificity to INs (**Figure 6H**). First, we wondered whether the input from SSp-bfd to different cell  
385 types can lead to action potential firing. We measured light-evoked PSPs of neighbouring PNs and INs

386 and observed that both cell types displayed cross-modal input (**Figure 6I**). Strikingly, a fraction of INs  
387 fired light-evoked action potentials in response to optogenetic stimulation of SSp-bfd axons. When  
388 classifying INs based on their maximum firing frequency obtained by step-current injections (**Figures**  
389 **S5E, S5F**), we found that only fast-spiking interneurons (FS INs) were able to fire action potentials  
390 upon blue light stimulation (both in GAD or PV/tdtomato mouse lines, **Figure 6J**). More specifically,  
391 while about 50% of FS INs did fire action potentials upon light activation, none of the measured PNs  
392 and non-fast spiking INs (nFS INs) showed light-evoked action potentials (**Figure 6K**). These  
393 observations strongly suggest that local inhibitory circuitry can be driven by long-range photoactivation  
394 and that the strong inhibition observed in VISp is mediated via FS INs indicating they are the main  
395 source for the observed feedforward inhibition recruited during cross-modal activation.

396  
397 We next sought to unravel the reason for FS INs showing light-evoked action potential firing in contrast  
398 to PNs albeit using the same power and duration of blue light. In principle, the specific SSp-bfd input  
399 strength to FS INs and PNs could differ and consequently explain the ability for one cell type firing  
400 action potentials over the other (**Figure 6L**). Alternatively, the biophysical properties of FS INs and  
401 PNs targeted by SSp-bfd could vary, resulting in different intrinsic excitability.

402  
403 To test the first hypothesis, we recorded from neighbouring PNs and FS INs (using the PV/tdTomato  
404 mouse line) and measured their light-evoked input strengths (**Figure 6L**). We found that there was no  
405 significant difference between the light-evoked EPSC amplitudes in these two cell types (**Figure 6M**).  
406 To test the second hypothesis, we measured the intrinsic cell excitability by extracting sub- and  
407 suprathreshold electrical properties of PNs and FS INs (both in PV and GAD/tdTomato mouse lines)  
408 directly targeted by SSp-bfd. While we found that most subthreshold properties were not significantly  
409 different between PNs and FS INs (see e.g. threshold current, **Figure 6N**), most suprathreshold  
410 properties were significantly different between these two cell types. Importantly, the difference between  
411 the resting membrane and action potential threshold was significantly reduced in FS INs compared to  
412 PNs rendering these interneurons more intrinsically excitable (**Figure 6O**). Moreover, the maximal  
413 increase of action potential firing frequency between two subsequent current injection steps – a measure  
414 of firing gain - was significantly greater for FS INs compared to PNs (**Figures S5G, S5H**). These distinct  
415 electrical properties were only found in FS INs but not for nFS INs (**Figure S5H**). In summary, the  
416 intrinsic properties of FS INs tend to make these cells more excitable to synaptic input from SSp-bfd  
417 compared to PNs.

418

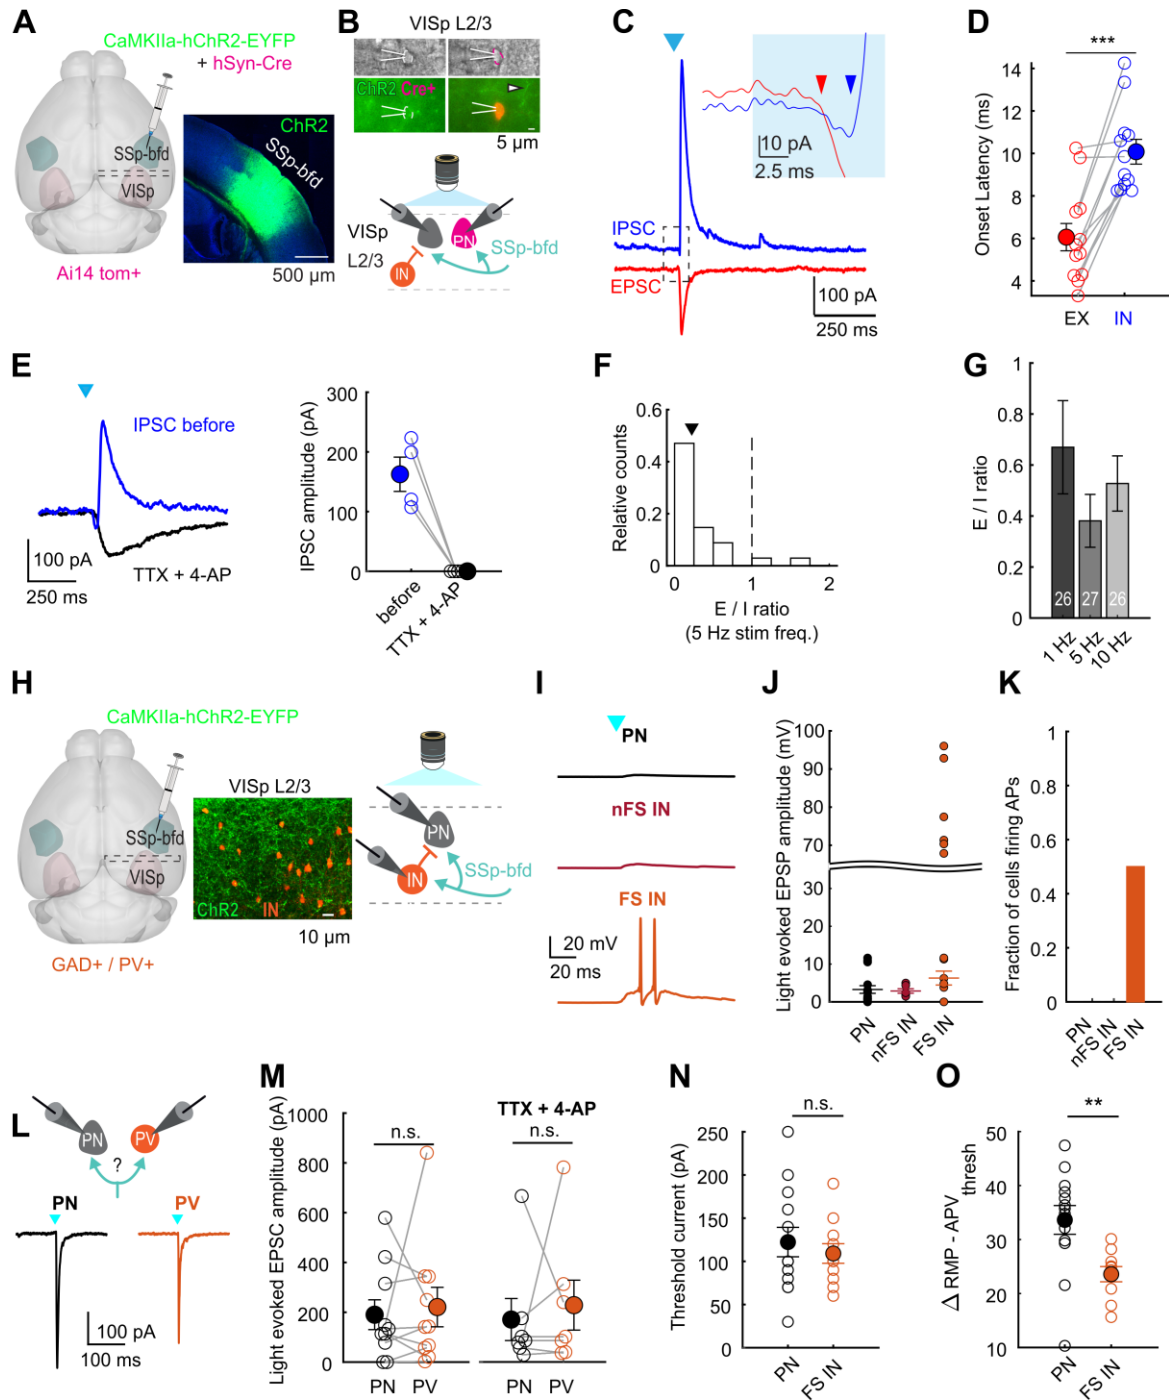

419

420 **Figure 6: SSp-bfd mediated feedforward inhibition onto L2/3 neurons in VISp.** (A) Schematic of viral injection approach  
 421 (left). AAV.CaMKIIa-hChR2-EYFP and AAV.hSyn.Cre were co-injected across all layers in SSp-bfd in Ai14 mice. Right,  
 422 Expression of AAV.CaMKIIa-hChR2 tagged with EYFP in SSp-bfd. (B) Top, epifluorescence images of Cre- and Cre+ L2/3  
 423 neurons in VISp during patch recording. Cre+ cells are anterogradely labelled cells (see also S5A and Methods). Arrow  
 424 highlights axonal fibers expressing AAV.CaMKIIa-hChR2-EYFP (green). Bottom, Schematic of recording and  
 425 photostimulation configuration. Neighboring Cre+ and Cre- cells were recorded in VISp while axonal fibers from SSp-bfd  
 426 were activated by 472 nm light. (C) Representative example of light-evoked inhibitory and excitatory postsynaptic current  
 427 (IPSC in blue and EPSC in red) in L2/3 pyramidal neuron (PN). Cell is clamped at 0 and -70 mV holding potentials,  
 428 respectively. SSp-bfd fiber stimulation elicited a short-latency monosynaptic EPSC followed by a delayed IPSC. Blue  
 429 arrowhead indicates light onset. Inset, enlarged view of the circled area, in which the two arrows indicate the onset of the EPSC  
 430 and IPSC. (D) Onset latencies of light-evoked IPSCs were significantly longer than that of light-evoked EPSCs. Mean (filled  
 431 circles) and individual data points (empty circles) are displayed. Lines connect peak EPSC and IPSC of the same cell (n=12  
 432 cells from 6 mice). Error bars are s.e.m., p<0.001, Wilcoxon signed rank. (E) Left, Representative IPSC recorded before (blue)  
 433 and after infusion of TTX and 4-AP (black). Right, Comparison between peak amplitude of IPSCs before and after infusion of

434 TTX and 4-AP. Mean and individual data points are displayed (n=4 cells from 4 mice). Error bars are s.e.m. (F) Distribution  
435 of E/I ratio across recorded cells (Cre+ and Cre- pooled, see S5B, S5C). Data are shown for 5 Hz light stimulation using peak  
436 response amplitudes for EPSCs and IPSCs (n=27 cells, from 7 mice). (G) Mean E/I ratio for different stimulation settings (1  
437 Hz, 100ms long; 5Hz, 10ms; 10Hz, 10ms). Error bars are s.e.m. Cell numbers are indicated. (H) Injection scheme for GAD/PV  
438 animals. Injection approach like (A). Middle, axonal fibers expressing AAV.CaMKIIa-hChR2 tagged with EYFP (green) and  
439 PV+ interneurons expressing tdtomato (orange). Right, schematic of recording and photostimulation configuration. (I) Example  
440 light-evoked postsynaptic potentials (EPSPs) for L2/3 PNs, non-fast spiking and fast spiking interneurons (nFS IN, FS IN).  
441 Arrowhead indicates light onset. Note that FS INs fired action potentials upon light activation. (J) Light-evoked sub- and  
442 suprathreshold EPSPs for PNs, nFS INs and FS INs. Suprathreshold action potential firing is displayed above curved line. (K)  
443 Fraction of cells showing light-evoked action potential firing. (L) Top, Recording configuration to probe light-evoked responses  
444 in neighbouring L2/3 PNs and PVs (FS INs). Bottom, Representative example of light-evoked EPSCs in PN and FS IN. (M)  
445 Comparison of evoked peak EPSCs for PNs and FS INs without (left) or with TTX and 4-AP present (right). Mean (filled  
446 circles) and individual data points (empty circles) are displayed. Lines connect neighboring cells (<100  $\mu$ m apart; n=11 cells  
447 and n=7 cells from 3 and 2 mice). Error bars are s.e.m. (p=0.85, p=0.65 Wilcoxon rank-sum). (N) Comparison of minimal  
448 amplitude of injected step current (Rheobase) that elicited action potential firing for PNs and FS INs (n=13 cells, n=11 cells  
449 from 6 mice, p=0.75 Wilcoxon rank-sum). (O) Comparison of membrane potential difference between resting membrane  
450 potential and spike threshold for PNs and FS INs (n=13 cells, n=10 cells from 6 mice, p<0.001, Wilcoxon rank-sum).

451

452 **Network model identifies a gain-dependent ISN regime to mediate the cross-modal suppression**

453 To investigate whether our optophysiological data can explain whisker stimulation mediated VISp  
454 suppression, we built a mathematical cross-modal network model of mean firing-activities of excitatory  
455 pyramidal (PN) and fast-spiking inhibitory (FS) neurons in SSp-bfd and VISp (**Figure 7A**). We modeled  
456 each cortical area using a well-established canonical cortical recurrent neural network (RNN) (Tsodyks  
457 et al., 1998; Wilson and Cowan, 1972) model and connected and constrained them based on our  
458 experimental data.

459

460 As depicted in **Figures 7B-7C** our model emulates SSp-bfd mediated suppression of visually driven  
461 VISp activity. In detail, we first stimulated VISp-RNN and subsequently stimulated the SSp-bfd-RNN  
462 using constant excitatory inputs, emulating visual and tactile stimulations. Inputs were sufficiently long  
463 allowing the firing activities to reach their steady-states; we call this specific state of each RNN as its  
464 fixed point (FP). Strikingly, while the tactile stimulation increases the population activities in SSp-bfd-  
465 RNN, it effectively suppresses both PN and FS population activities in VISp-RNN (compare activity  
466 levels at  $FP_v$  and  $FP_{v+w}$ ; **Figure 7B**, solid lines). This suppression is also present in the time course as  
467 well as in the spatial illustrations of the steady states of sum activities in these regions (**Figures 7C-7E**).  
468 Importantly, these results corroborate our experimental data (see Figure 2 and S2). Moreover, our model  
469 shows that SSp-bfd input to VISp is able to be transiently amplified by its PN population (**Figure 7F**),  
470 prior to the overall suppression (**Figure 7B**). We further find that this amplification time-window is  
471 mainly provided by the slower evolution of FS activity response than PN population, upon the onset of  
472 tactile stimulation (**Figure 7F**).

473

474 The model suggests that VISp processes the cross-modal input under an inhibition-stabilized network  
475 (ISN) regime (Ozeki et al., 2009; Rahmati et al., 2017; Tsodyks et al., 1997), underpinning the  
476 suppression phenomenon. This can be seen in  $A_{FS}$ - $A_{PN}$ -plane of VISp-RNN (**Figure 7G**), representing  
477 the nullclines (i.e. the steady state dynamics) of its population activities ( $A_{FS}$ - and  $A_{PN}$ -nullclines): At  
478 the nullclines intersection approached after visual stimulation ( $FP_v$ ), both  $A_{PN}$ - and  $A_{FS}$ -nullclines have  
479 positive slopes but  $A_{FS}$ -nullcline is steeper which means that inhibition is necessarily and sufficiently  
480 strong to stabilize the whole RNN activity (ISN regime). Under this regime both PN and FS populations  
481 show an overall reduction in activity after adding tactile stimulation. Note that the suppression under  
482 ISN often requires stronger excitatory input to FS, while our optophysiological data show SSp-bfd inputs  
483 of similar size to both FS and PN populations in VISp. Under this constraint, our model reveals that the  
484 higher firing gain of FS inhibitory neurons compared to PN plays an important role in driving the  
485 suppression phenomenon. More specifically, we find that not only the emergence and strength of the  
486 suppression (**Figure 7H**), but also the size of transient amplification (**Figures 7I, 7J**) and the inhibition  
487 delay (**Figure 7K**) are effectively dependent on this biological constraint. Taken together, our modeling

488 results indicate that VISp processes the SSp-bfd-mediated cross-modal suppression under a gain-  
 489 dependent ISN regime.  
 490

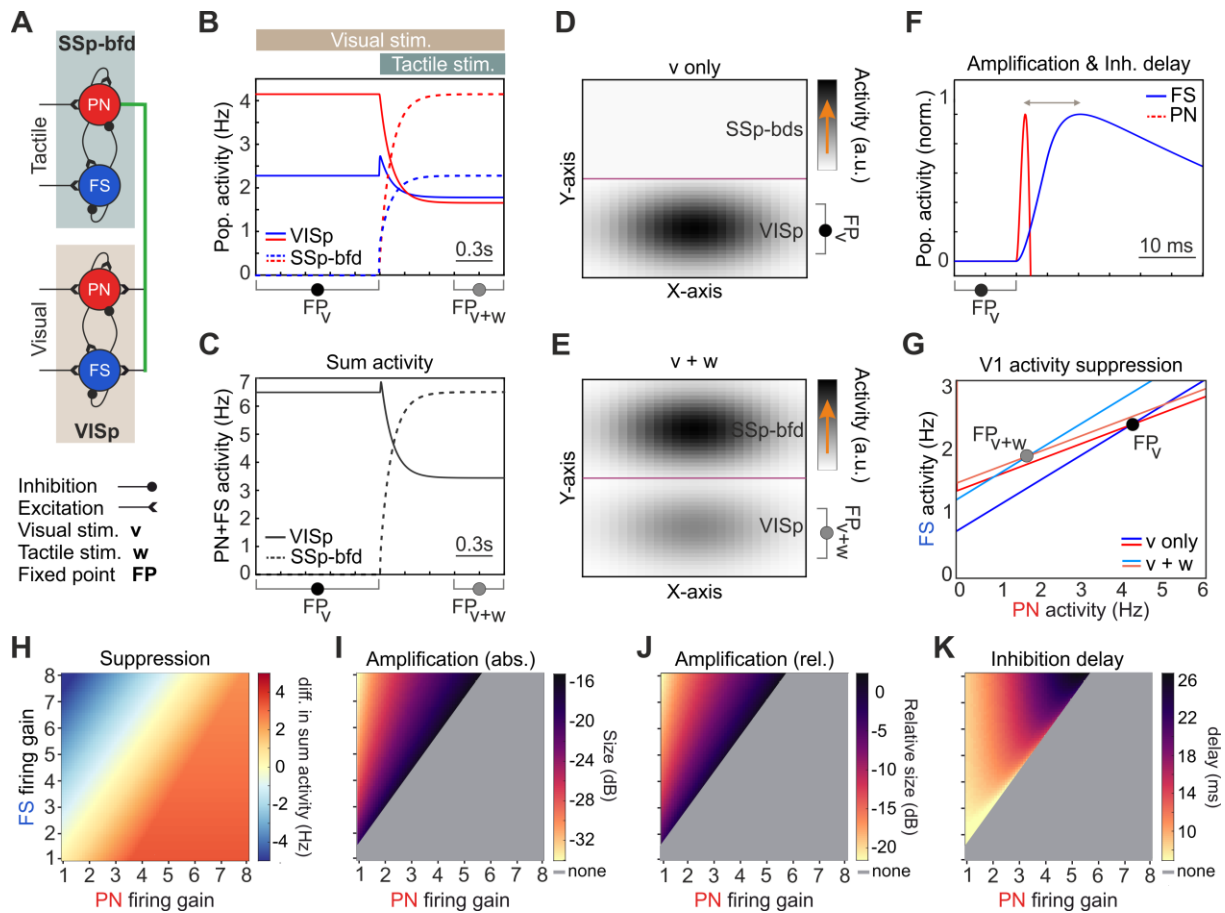

492 **Figure 7: A cortical network model identifies a gain-dependent ISN regime to mediate VISp suppression by tactile**  
 493 **stimulation.** (A) Schematic diagram of the cross-modal model of coupled VISp and SSp-bfd regions, each modeled as a  
 494 recurrent neural network (RNN) of pyramidal (PN) and fast-spiking (FS) neural populations. (B) Stimulated visual activity is  
 495 suppressed by tactile stimulation. Tactile stimulation ( $w$ ) is added when visual stimulation ( $v$ ) was already present. These inputs  
 496 were modeled as constant excitatory inputs.  $FP_v$  and  $FP_{v+w}$  denote the fixed point of VISp-RNN at which its PN and FS  
 497 population activities ( $A_{PN}$  and  $A_{FS}$ ) approached their steady states. (C) Same as (B), but for the sum activities:  $A_{PN}+A_{FS}$ . (D, E)  
 498 Graphical, spatial illustration of the suppression based on the sum activity levels at  $FP_v$  and  $FP_{v+w}$  shown in (C). (F) SSp-bfd-  
 499 mediated input to VISp-RNN is transiently amplified by its PN population, as FS response evolve slower (inhibition delay).  
 500 Zoom-in of the scaled, overlaid VISp-RNN population activities shown in b, around the onset of tactile stimulation. (G) VISp  
 501 operates, and mediates the cross-modal suppression, under an ISN regime. The  $A_{FS}-A_{PN}$ -plane of the VISp-RNN's stationary  
 502 dynamics. The lines represent  $A_{PN}$ - and  $A_{FS}$ -nullclines of VISp-RNN's PN and FS population activities before ( $v$  only; red and  
 503 blue lines) and after adding the tactile stimulation ( $v+w$ ; brown and bluish lines). Note the reduction in PN and FS activities at  
 504  $FP_{v+w}$ , as compared to  $FP_v$ . (H) The gain-dependency of the strength of VISp suppression by the SSp-bfd-mediated input.  
 505 Color-coded matrices of the suppression strength computed as the difference in sum activity ( $FP_{v+w}$  minus  $FP_v$ ), for different  
 506 combinations of PN and FS firing gains. Negative values (mainly blue) indicate suppression. (I) Same as (H), but for the  
 507 absolute amplification size, defined in (F). (J), Same as (H), but for the relative amplification size. (K) Same as (H), but for the  
 508 inhibition delay, defined in (F).

509

510 **Tacto-visual convergence in visual proximity space**

511 So far we showed that whisker mediated SSp-bfd activation predominantly suppresses visually driven  
512 activity in the anterior part of VISp. This location of postsynaptic neurons is associated with the lower  
513 nasal visual space, thereby defining a restricted external space of tacto-visual modulatory influences  
514 mediated by SSp-bfd. Here, we investigated the dynamic association of the whisker tips with this  
515 modulated visual zone in the mouse proximity space. As demonstrated above, towards their final  
516 protraction position, whisker tips also accumulated in the lower, nasal visual space (**Figure 8A**) and this  
517 spatial location strongly resembles the visual space coverage of the cross-modally modulated  
518 postsynaptic neurons. Indeed, whisker tip locations and the modulated visual space gradually converged  
519 during the course of whisker protraction (**Figures 8A, 8B**). Notably, under protraction conditions both,  
520 whisker and cross-modally modulated visual space practically covered the same spatial extent and were  
521 strongly overlapping (**Figure 8A**). Moreover, in this constellation practically all caudal whiskers  
522 identified to be important for tactile integration in VISp (see Figure 4) were located inside the modulated  
523 visual space (**Figures 8A, 8B**). This suggests that mice can actively move their whiskers through the  
524 space in which visual processing is modulated by the whiskers themselves. This further reveals that  
525 tacto-visual convergence in mouse proximity space is precisely reflected at the cortical level of VISp.

526

527 However, what might be a reason for the higher relative importance of the caudal whiskers for tactile  
528 integration in VISp? Measuring their length and eye-to-tip distance in our 3D model revealed that these  
529 whiskers are the longest, whose tips always reach furthest away from the eye into the proximity space  
530 (**Figure 8C**). Thus, when mice approach objects there is a high probability that these particular whiskers  
531 are involved in the first contact. Thereby, visual signals originating from the same object may be  
532 suppressed instantly.

533

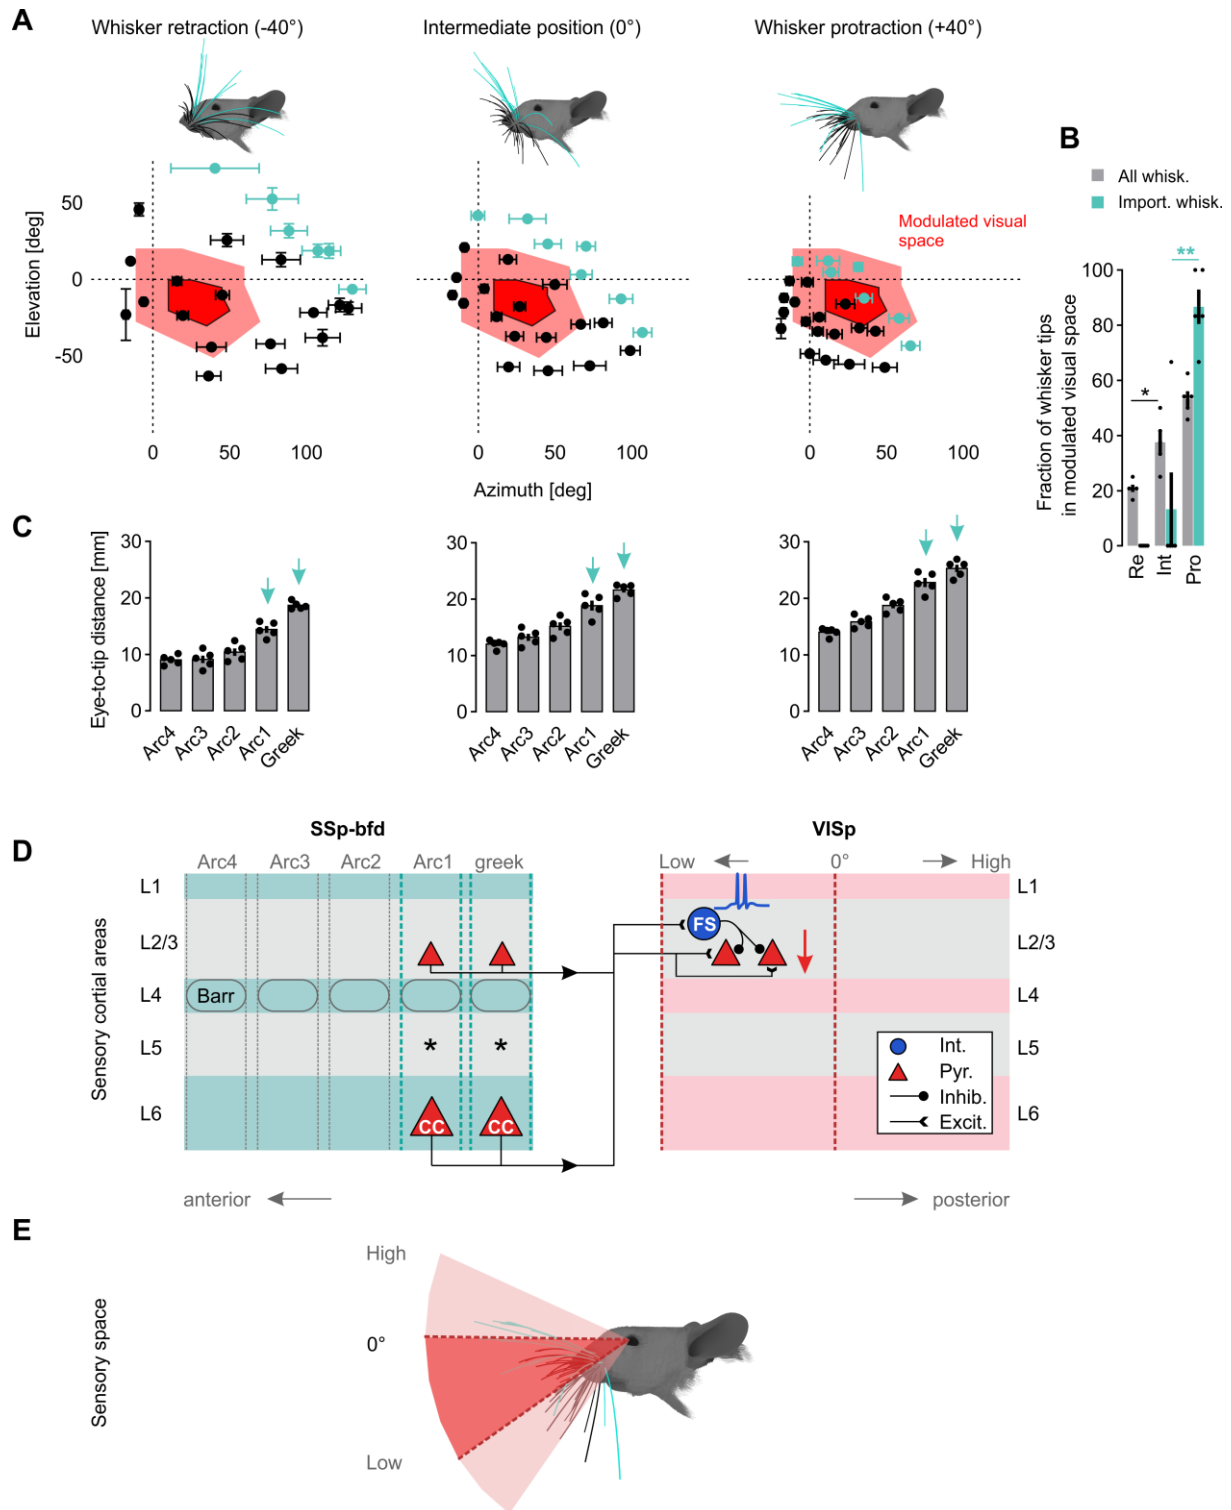

534

535 **Figure 8: Tacto-visual convergence in the mouse proximity space.** (A) Mapping of tacto-visual overlap along azimuth and  
 536 elevation. Red area with surrounding solid black line: Coverage map of visual space covered by the VISp region with the  
 537 highest fraction (at least 5% on average) of postsynaptic neurons labeled after SSp-bfd injections. Bright red area: Coverage  
 538 map of visual space covered by the same VISp region mapped by eye movements. Centroids indicate positions of whisker tips.  
 539 Colored centroids represent the tips of the caudal whiskers above identified to be important for visual processing. (B) Fraction  
 540 of whisker tips located within the visual space covered by VISp under eye movement conditions (bright red area in (A)) during  
 541 whisker retraction (Re), in the intermediate position (Int) and during protraction (Pro). Black circles indicate data points of  
 542 individual mice and bars indicates the mean fraction of whisker tips on total number whiskers  $\pm$  s.e.m (the 24 large whiskers,  
 543 grey bars, Re vs. Int,  $p=0.0331$ ; Int vs. Pro,  $p=0.1349$ ; the 7 “important” whiskers, colored bars, Re vs. Int,  $p=1$ ; Int vs. Pro,  
 544  $p=0.0087$ ; paired t-tests followed by Bonferroni correction). (C) Diagrams show the average eye-to-whisker tip distance of  
 545 each of the arcs under retraction, intermediate and protraction conditions  $\pm$  s.e.m. Black dots represent data points of individual



546 mice. Colored arrows indicate the arcs containing the whiskers important for cross-modal tactile integration in VISp. \* $p < 0.05$ ,  
547 \*\* $p < 0.01$ . (D) Summary Figure. In SSp-bfd both excitatory CC-neurons in L6 and excitatory neurons in L2/3 predominantly  
548 located in posterior barrel columns of SSp-bfd send direct axonal projections to the anterior region of VISp. Here, these  
549 projections innervate excitatory pyramidal and FS inhibitory neurons in L2/3. Because this innervation evokes spiking in FS  
550 but not pyramidal neurons, visually evoked neuronal activity in pyramidal neurons becomes inhibited (feed-forward inhibition).  
551 (E) Summary Figure. The anterior region of VISp processes visual signals originating in the lower, nasal visual space. Under  
552 whisker protraction conditions such as during object exploration, whisker tips are precisely located in this part of the visual  
553 space. Thus, tacto-visual convergence in VISp is precisely reflected in the mouse proximity space. Colored whiskers  
554 predominantly innervate the posterior barrel columns and thus play an important role in SSp-bfd mediated suppression of VISp  
555 activity. Their tips reach furthest into the mouse proximity space increasing the probability that they are involved in the first  
556 contact with an object during exploratory behavior.

557

### 558 **3 Discussion**

559 Here we find that whisker stimulation suppresses visually elicited responses in VISp via a SSp-bfd  
560 originating cortico-cortical pathway that drives FS inhibitory neuron mediated feed-forward inhibition  
561 (FFI) in L2/3 excitatory neurons (**Figure 8D**). We show that both projection and postsynaptic neurons  
562 involved in this microcircuit are predominantly located at the border regions of SSp-bfd and VISp,  
563 respectively, which are in close proximity to each other. Thus, in terms of visual field representations  
564 of postsynaptic neurons in VISp, SSp-bfd mediated suppression is likely to be restricted to the lower,  
565 nasal part of the visual space. Importantly, this space substantially overlaps with the external space,  
566 where whiskers perform tactile exploration (**Figure 8E**). This suggests that the specific tacto-visual  
567 convergence in proximity space is also reflected at the anatomical and functional level of VISp,  
568 providing a cortical anatomical locus for sensory interactions.

569  
570 Multisensory convergence has been suggested to mainly occur in higher-order cortical association areas  
571 (Felleman and Van Essen, 1991; Jones and Powell, 1970; Sugihara et al., 2006; Teichert and Bolz,  
572 2018). However, evidence shows that even primary cortical sensory areas, in which sensory processing  
573 was previously assumed to be conducted on a sense-by-sense basis (Wallace et al., 2004), can be  
574 multisensory (Deneux et al., 2019; Ibrahim et al., 2016; Iurilli et al., 2012; Kayser et al., 2008; Renard  
575 et al., 2022; Teichert and Bolz, 2017, 2018; Velez-Fort et al., 2018). For example, visual processing in  
576 mouse VISp is influenced by sounds (Deneux et al., 2019; Ibrahim et al., 2016; Iurilli et al., 2012;  
577 Teichert and Bolz, 2017; Teichert et al., 2017). While tacto-visual convergence in rodents has been  
578 suggested to occur in the superior colliculus (Drager and Hubel, 1975; Meredith and Stein, 1983; Shang  
579 et al., 2019) and higher-order cortical areas (Nikbakht et al., 2018; Olcese et al., 2013), it remained  
580 unclear whether primary sensory areas contribute to tacto-visual processing as well. Here, we  
581 demonstrate that visually evoked responses in VISp are also cross-modally modulated by the sense of  
582 touch. In line with our findings, cross-modal suppression is a frequently observed feature of multimodal  
583 tactile integration in sensory cortical areas both in humans (Ide et al., 2016) and other species (Meredith  
584 and Allman, 2015; Rao et al., 2014). For instance, whisker stimulation causes a global suppression of  
585 sound evoked activity in mouse AUDp (Lohse et al., 2021). Thus, tactile stimulation induced cross-  
586 modal suppression of sensory elicited activity in other cortical primary sensory areas may represent a  
587 mechanism by which tactile inputs from nearby objects that require immediate attention are processed  
588 with priority. This interpretation is in line with our finding that especially the long caudal whiskers  
589 covering the largest search space during whisking are particularly important for VISp processing  
590 (**Figures 4 and 8**). These whiskers are likely involved in the first contact with an object especially during  
591 navigation and object exploration, when whiskers are protracted (Sofroniew and Svoboda, 2015). This  
592 will lead to immediate VISp suppression and may therefore shift attention towards tactile cues.  
593 However, although tactile driven suppression of visual activity in VISp may reflect the higher relative  
594 importance of tactile cues in close proximity, a reduction of VISp responses could be accompanied by

595 a suppression of non-specific noise (Nikbakht et al., 2018) in the visual stimulus representation  
596 potentially sharpening visual tuning. Indeed, auditory stimulation sharpens visual orientation selectivity  
597 in VISp (Ibrahim et al., 2016). Taken together, our data strongly support the growing concept of  
598 multisensory primary sensory cortical areas. Thus, along sensory information streams, these early  
599 hierarchical areas potentially belong to the first brain regions where multisensory integration occurs  
600 suggesting that downstream higher-order cortical areas and association areas receive a preprocessed  
601 digest of multisensory information.

602  
603 It has been described that optimal multisensory integration is achieved when sensory stimuli are  
604 presented to different sensory modalities in not only a temporally but also spatially coherent manner  
605 (Holmes and Spence, 2005). In terms of the latter “spatial rule” (Holmes and Spence, 2005) we find that  
606 the anatomic arrangement of whiskers and eyes ensures that objects in the mouse proximity space are  
607 usually sensed through both of these modalities. According to our simulations, this is especially true  
608 when mice protract their whiskers (**Figures 1 and 8**). In this condition, an object in the lower visual field  
609 on the ground might be palpated more efficiently by more whiskers leading to a strong activation of the  
610 (posterior) barrel columns in SSp-bfd and ultimately to a stronger cross-modal innervation of VISp. In  
611 conclusion, the marked peripheral overlap of tactile and visual information streams may allow for  
612 optimal tacto-visual integration in VISp.

613  
614 It has been suggested that primary sensory areas are separated from one another by transitional  
615 multisensory zones as revealed by *in vivo* electrophysiological recordings in rats (Wallace et al., 2004).  
616 Indeed, in rodents, the higher-order visual area RL, a part of the rodent posterior parietal cortex (Hovde  
617 et al., 2019; Nikbakht et al., 2018), is situated between SSp-bfd and VISp and represents a transitional  
618 multisensory area converging both tactile and visual signals (Nikbakht et al., 2018; Olcese et al., 2013).  
619 Our results extend this view by demonstrating that such transitional zones even exist within primary  
620 sensory areas. We find that projection neurons in SSp-bfd and postsynaptic neurons as well as SSp-bfd  
621 originating axons in VISp display strong gradients pointing away from each other (**Figures 3 and 5**).  
622 This suggests that SSp-bfd exerts its suppressive influence mainly on neurons located in the anterior  
623 part of VISp. Consequently, the vicinity of projection and postsynaptic neurons may ensure a fast and  
624 economic integration of tactile signals in VISp. Taken together, these findings indicate that mainly  
625 transitional border regions of primary sensory areas integrate cross-modal sensory information from  
626 neighboring sensory cortical regions. These results might have further implications for defining  
627 subdivisions even within primary sensory cortical areas, to distinguish between uni- and multisensory  
628 subregions, based on anatomy and function.

629  
630 Interestingly, neurons in the anterior transitional border region of VISp display distinct functional  
631 features as compared to neurons located more posterior. In mice these neurons are significantly activated

632 by objects in close proximity (near disparity tuned) (La Chioma et al., 2019). Given the strong overlap  
633 of the visual space with the space mapped by the whiskers (**Figures 1 and 8**), these objects may also be  
634 in reach of the whiskers. Moreover, neurons representing the lower visual field are significantly more  
635 responsive to coherent visual motion (Sit and Goard, 2020). Interestingly, also whiskers and their  
636 corresponding neuronal representations in SSp-bfd act as motion detectors (Laboy-Juarez et al., 2019).  
637 Thus, the integration of tactile signals in visual processing in the anterior region of VISp may create a  
638 multisensory representation of both peripersonal space and moving objects within this space. This is  
639 potentially important for multisensory behaviors requiring tacto-visual interactions such as object  
640 exploration (Nikbakht et al., 2018) or predatory hunting (Shang et al., 2019).

641  
642 Our imaging data indicate a more global suppression of visually driven VISp responses beyond the  
643 anterior part of VISp (**Figure 2**). This might be explained by the limited spatial and temporal resolution  
644 of intrinsic signal imaging, or by a slow and delayed horizontal spread (Das and Gilbert, 1995; Fehervari  
645 et al., 2015; Orbach and Van Essen, 1993) of the multisensory signals from the anterior to posterior part  
646 of VISp. Alternatively, as RL and some other higher-order visual areas contain numerous SSp-bfd-  
647 recipient postsynaptic neurons (**Figure 5**) and send strong feedback projections to VISp (Glickfeld and  
648 Olsen, 2017; Wertz et al., 2015), we cannot rule out that these areas provide additional whisker  
649 information to posterior VISp.

650  
651 Audiovisual processing in VISp is mediated by direct cortico-cortical connections from AUDp to VISp  
652 (Deneux et al., 2019; Ibrahim et al., 2016; Iurilli et al., 2012). For example, optogenetic stimulation of  
653 AUDp projections modulates visually evoked responses in VISp (Iurilli et al., 2012). Similarly, our  
654 anatomical and functional data strongly argue that also tacto-visual integration is achieved by the  
655 recruitment of direct cortico-cortical connections originating in SSp-bfd (**Figure 3**). On the other hand,  
656 our data do not provide evidence for a pathway in which SSp-bfd relays whisker information to VISp-  
657 projecting subcortical areas (**Figure 5**), as recently suggested for tactile integration in AUDp (Lohse et  
658 al., 2021). These results support the novel view of anatomically and functionally interconnected primary  
659 sensory cortical areas. Strikingly, we observe that VISp projecting neurons in SSp-bfd are most abundant  
660 in L6 (**Figure 3**). This is in line with previous retrograde tracing studies in rats (Bieler et al., 2017). In  
661 contrast, by using the b-fragment of cholera toxin in mice (Masse et al., 2017) for retrograde tracing  
662 experiments, previous investigations revealed that projection neurons involved in the same pathway are  
663 mainly located in L5 and only a small portion was found in L6 (Masse et al., 2017). This discrepancy  
664 might be explained by the limited depth of cortical injections performed by these authors (Masse et al.,  
665 2017). In addition, the usage of newly developed highly efficient tracers such as retro-AAVs (Tervo et  
666 al., 2016) as used here, reveals a more prominent involvement of L6 in cortico-cortical communication  
667 (Liang et al., 2021), than previously thought.

668

669 Notably, L6 is located in a strategic position within the cortex, receiving input from and providing output  
670 to the local column (Velez-Fort et al., 2014) and other cortical and sub-cortical brain regions (Briggs,  
671 2010; Liang et al., 2021). However, little is known about the function and projection patterns of CC  
672 neurons in L6. L6CCs in sensory areas receive strong thalamic input (Crandall et al., 2017) and send  
673 extensive and horizontally orientated projections (Velez-Fort et al., 2014) to cortical motor areas (Zhang  
674 and Deschenes, 1997) and across the corpus callosum (Liang et al., 2021). Here, we extend this  
675 knowledge by demonstrating that L6CC projections can also cross the border of their host primary  
676 sensory area to innervate primary areas of other sensory modalities. This suggests that L6CCs are key  
677 players in cross-modal integration. Importantly, neuronal responses in L6CCs in rodent SSp-bfd to  
678 whisker deflections precede those in all other excitatory cell types by 3 ms (including neurons in L4)  
679 (Egger et al., 2020). Thus, these neurons are ideal candidates to rapidly and efficiently relay whisker  
680 information to VISp for tacto-visual integration as they are operating on short latency time scales.

681  
682 Our optophysiological data in combination with our mathematical cortical network model show that  
683 cross-modal SSp-bfd mediated suppression of VISp activity can be largely explained by recruitment of  
684 FFI onto L2/3 PNs (**Figures 6 and 7**). This observed long-range recruitment of L2/3 for multisensory  
685 integration is in line with numerous previous studies (Deneux et al., 2019; Ibrahim et al., 2016; Iurilli et  
686 al., 2012). Long-range connections from different brain areas have been shown to preferentially recruit  
687 specific sets of L2/3 INs in a given postsynaptic brain area (Naskar et al., 2021). We find that FFI is  
688 mediated by local PV<sup>+</sup> FS cells, which have been shown to be the most abundant neuron type in FFI  
689 (Tremblay et al., 2016). The previously described perisomatic targeting of PV<sup>+</sup> INs together with the  
690 here observed intrinsic properties enabling high speed fidelity, provides unique temporal filtering  
691 properties permitting precise coincidence detection onto postsynaptic PNs. However, other layers and  
692 interneuron types have also been shown to be involved in FFI and ultimately in multisensory integration  
693 (Ibrahim et al., 2016; Iurilli et al., 2012). Therefore, the exact circuit motif for long-range cross-modal  
694 FFI might be specific for a given pair of pre- and postsynaptic cortical brain areas. Additionally, the  
695 specific circuit recruitment and the gain of involved neurons has been shown to vary based on internal  
696 and external influences (Ferguson and Cardin, 2020). Thus, the effects of whisker stimulation on VISp  
697 responses may dynamically adapt (**Figure 7**) or even inverse (e.g. excitation) in response to changing  
698 inputs depending on influences such as arousal, attention, locomotion or specific stimulus features  
699 (Ferguson and Cardin, 2020).

700  
701 In summary, our study provides direct anatomical and physiological evidence for multisensory  
702 integration at the level of primary sensory cortices where external space is shared by two sensory  
703 systems. It further suggests that primary sensory cortices are heavily involved in generating complex  
704 multisensory representations for high-order processing.

705

## 706 **4 Methods**

707

### 708 **Animals**

709 All experiments were performed on 4–14 week old mice of both sexes. The following mouse strains and  
710 transgenic mouse lines were used: C57BL/6J and Ai14 (Cre-dependent tdTomato reporter) mice  
711 (Jackson Laboratories, RRID: IMSR\_JAX:007914). Ntsr1-Cre-tdTomato reporter mice were bred by  
712 crossing Ntsr1-Cre (layer 6 cortico-thalamic cells; GenSAT 030648-UCD) with Ai14 mice. Similarly,  
713 Gad2-Cre-tdTomato and PV-Cre tdTomato reporter mice were bred by crossing Gad2-IRES-Cre with  
714 Ai14 mice. Mice were raised in standard cages on a 12 h light/dark cycle, with food and water available  
715 *ad libitum*. Animal housing is regularly supervised by veterinaries from the state of Thuringia, Germany.  
716 All experimental procedures were in accordance with the German Law on the Protection of Animals,  
717 the corresponding European Communities Council Directive 2010 (2010/63/EU), with the UK Home  
718 Office regulations (Animal Scientific Procedures, Act 1986), approved by the Animal Welfare and  
719 Ethical Review Body (AWERB; Sainsbury Wellcome Centre for Neural Circuits and Behaviour) and in  
720 compliance with ARRIVE guidelines. Every effort was made to minimize the number of animals and  
721 their suffering.

722

### 723 **3D-reconstruction of the mouse whisker array and the visual space**

724 Because the reconstructed whisker array was finally aligned and fit to an existing realistic 3D model of  
725 the mouse, which was generated from 8-13 weeks old female mice (Bolanos et al.,  
726 2021)(<https://osf.io/h3ec5>) , we used mice of the same age and sex for whisker reconstruction. We  
727 always reconstructed the 24 large caudal whiskers (greeks, and arcs 1 to 4) on the left side of the snout.  
728 For stability reasons, whiskers were reconstructed from dead mice approximately 2 h after death initiated  
729 by an overdose of isoflurane in a sealed container. The 3D distribution of the whiskers in this condition  
730 was defined as their intermediate position. Importantly, this position only marginally differed from the  
731 position of whiskers in anesthetized mice (data not shown). For fixation the scalp was removed and a  
732 small magnet was glued to the skull using cyanoacrylate. This magnet was then attached to a metal bar  
733 fixed in a micromanipulator (BACHOFER, Reutlingen) to allow for adjustments of the mouse position.  
734 Whiskers were then reconstructed by stereo photogrammetry (Heist et al., 2018; Stark et al., 2019). In  
735 brief, the mouse head including the whiskers was illuminated by structured light generated by a custom-  
736 written software in MATLAB 2019-2022 and delivered by a commercial projector (AOPEN QF12 LED  
737 Projector). Subsequently 90 stereo images were taken by two cameras (ALLIED Vision Technologies,  
738 guppy pro) focusing on the mouse head from different angles. This procedure was repeated 4-6 times  
739 with the mouse positioned in different orientations to ensure capturing of the whole whisker array.  
740 Finally, the detection of corresponding homologous point pairs then allowed for 3D-reconstruction of  
741 the mouse head including the whiskers via triangulation using custom software written in C++11.  
742 Generated point-clouds were then visualized, aligned and processed using the free open-source software  
743 CloudCompare v2.12 (<https://www.cloudcompare.org>) to obtain one final 3D point cloud including all

744 whiskers of the array. However, occasionally some whiskers were not fully reconstructed up to their  
745 thin tip. To solve this issue all whiskers of the same previously scanned mice were cut right above the  
746 skin, micrographs were taken using a standard stereo microscope (Stemi SV6, ZEISS) and whiskers  
747 were traced in 2D along their midline from their base to their tips using the “b-spline” tool in  
748 CorelDRAW 2021.5. Notably, after cutting the whiskers additional stereo images (90) were taken from  
749 the mystacial pad after marking the whisker base points with ink for better visualization and a 3D-  
750 reconstruction was performed as described above. Thus, the exact origin of each individual whisker  
751 could be determined. Traced whiskers were then scaled to their real size and imported into  
752 CloudCompare v.2.12 as .obj-files. Here, corresponding 3D-reconstructed and 2D traced whiskers were  
753 first manually aligned and then finely registered to each other using the iterative closest point (ICP)-  
754 algorithm included in CloudCompare v.2.12. The alignment of the 3D-reconstructed and 2D-traced  
755 whiskers was considered sufficient as whisker curvature has been observed to occur mostly in one plane  
756 (Dougill et al., 2020). Indeed, the average radial distance between these two representations ranged only  
757 around  $0.16 \pm 0.1$  mm across whiskers of all mice. Finally, the head of the existing realistic 3D model of  
758 the mouse (Bolanos et al., 2021) was imported from the free open-source software Blender v3.2.0  
759 (<https://www.blender.org/download/>) into CloudCompare v.2.12 as an .obj-file and the 3D-  
760 reconstructed point clouds of the mouse head including the traced whiskers and the mystacial pad were  
761 aligned to it, based on visual inspection. Thus, whiskers now had the correct origin, orientation, length  
762 and shape with respect to the realistic model of the mouse head (Bolanos et al., 2021). Subsequently,  
763 this model of the whisker array was imported back into Blender v3.2.0 as a .dxf-file and re-adjusted to  
764 the realistic 3D mouse model.

765  
766 The 3D reconstruction of the visual space coverage of VISp was performed based on retinotopic  
767 mapping data from (Zhuang et al., 2017). These maps contain the azimuth and elevation as mapped  
768 across the visual cortical area by presenting spherically-corrected checkerboard visual stimuli drifting  
769 across the visual field (Zhuang et al., 2017). Maps of mouse VISp containing azimuth and elevation  
770 contour plots (contours of  $5^\circ$  intervals from  $0^\circ$  to  $90^\circ$  in azimuth and  $-25^\circ$  in elevation) (Zhuang et al.,  
771 2017) were then used to estimate the extend of VISp visual space coverage. For this, azimuth and  
772 elevation coordinates along the border of VISp were determined and used for 3D-reconstruction of  
773 visual space in Blender v3.2.0. Here, we created a left eye-centered spherical coordinate system and  
774 implemented the azimuth and elevation values of the VISp visual space coverage. The resulting visual  
775 space was cut at 3 cm away from the left eye for better illustration.

776  
777 For quantifying the overlap between EGFP-expressing projection neurons and GAD-tdTomato or Ntsr1-  
778 tdTomato expressing cells in SSP-bfd,  $50 \mu\text{m}$ -thick brain slices were mounted in Vector Shield mounting  
779 solution. Coronal images across slices were then acquired on a confocal microscope (Leica SP8, 10x oil  
780 immersion, optical section step of  $1 \mu\text{m}$ ) and overlap was manually quantified in ImageJ.

## 781 **Simulation of whisker and eye movements**

782 Simulations of whisker retraction and protraction were performed in Blender v3.2.0  
783 (<https://www.blender.org/download/>). Generally, in mice, during retraction and protraction the  
784 azimuthal whisker angle is highly correlated across whiskers and elevation movements are anticorrelated  
785 with azimuth (Petersen et al., 2020). In other words, when mice protract their whiskers they  
786 simultaneously move them downwards and when they retract them they move upwards with respect to  
787 the mouse head. From these data we estimated, that downwards and upwards movements of all whiskers  
788 roughly follow a plane fitted through the basepoints (on the mystacial pad) and whisker tips of the  
789 corresponding row (but see (Petersen et al., 2020), Fig. 4E). Such a plane was created for the whiskers  
790 of each row in blender v3.2.0 using a custom-based software written in Python  
791 (<https://raw.githubusercontent.com/varkenvarken/blenderaddons/master/planefit.py>). In order to  
792 simulate extreme whisker retraction and protraction, whiskers were rotated around their basepoint  
793 parallel to this plane to  $-40^\circ$  or  $+40^\circ$  as starting from their intermediate position. The most caudal creek  
794 whiskers ( $\alpha$ - $\delta$ ) were rotated parallel to the plane of their corresponding rows (A-D). Typically, during  
795 retraction and protraction whiskers also rotate around their longitudinal axis (Petersen et al., 2020).  
796 However, as rotation would only marginally affect the position of the whisker tips in space, this  
797 movement was not included in our model. Animations of simulated whisking behavior were created in  
798 Blender v.3.2.0 and rendered using the Eevee-engine. Eye-movements were simulated by extending the  
799 VISp visual field coverage by  $20^\circ$  in each direction.

800

## 801 **Intrinsic signal imaging**

802 Animals were initially anesthetized with 4% isoflurane in a mixture of 1:1 O<sub>2</sub>/N<sub>2</sub>O and placed on a  
803 heating blanket (37.5 °C) for maintaining body temperature. Subsequently, mice received injections of  
804 chlorprothixene (20 µg/mouse i. m.) and carprofen (5 mg/kg, s. c.). The inhalation anesthesia was  
805 applied through a plastic mask and maintained at 0.5 - 0.7% during experiment. The skin above the right  
806 hemisphere was removed and a metal bar was glued to the skull to fix the animal in a stereotaxic frame  
807 using dental acrylic. Next, the skin above the left hemisphere was removed to expose visual and  
808 somatosensory cortical areas. The exposed area was covered with 2.5% agarose in saline and sealed  
809 with a glass coverslip. Cortical responses were always recorded through the intact skull.

810

811 Using a Dalsa 1M30 CCD camera (Dalsa, Waterloo, Canada) with a 135 × 50 mm tandem lens (Nikon,  
812 Inc. Melville, NY), we first recorded images of the surface vascular pattern via illumination with green  
813 light ( $550 \pm 2$  nm) and, after focusing 600 µm below the pial surface, intrinsic signals were obtained via  
814 illumination with red light ( $610 \pm 2$  nm). Frames were acquired at a rate of 30 Hz and temporally  
815 averaged to 7.5 Hz. The 1024 × 1024 pixel images were spatially averaged to a 512 × 512 resolution.  
816 Responses of VISp were recorded as described originally (Kalatsky and Stryker, 2003). Briefly, the  
817 method uses a periodic stimulus that is presented to the animal for some time and cortical responses are



818 extracted by Fourier analysis. In our case, the visual stimulus was a drifting horizontal light bar of 2°  
819 width, a spatial frequency of 0.0125 cycles/degree, 100% contrast and a temporal frequency of 0.125  
820 Hz. It was presented on a high refresh rate monitor (Hitachi Accuvue HM 4921-D) placed 25 cm in front  
821 of the animal. Visual stimulation was adjusted so that it only appeared in the nasal visual field of the left  
822 eye (-5° to +15° azimuth, -17° to +60° elevation). The stimulus was presented to both eyes  
823 simultaneously for 5 min. Thus, it was repeated for about 35 times during one presentation. The facial  
824 whiskers on the left side of the snout were first stimulated by a moving metal pole which was connected  
825 to an Arduino (Arduino-Uno, Genuino, USA) controlled hybrid polar stepping motor (SOYO, USA).  
826 Simultaneously, the metal pole vibrated with a frequency of 20 Hz (sinusoidal). The pole was first  
827 moved in dorsoventral direction from the A-row to the E-row of the whiskers array within 8 s (temporal  
828 frequency of 0.125 Hz) for 5 min, thereby sweeping over the whisker tips and deflecting them by an  
829 angle of about 20-25° before they whipped back in their normal position. In order to remove the  
830 hemodynamic delay of the intrinsic signals, both the visual and whisker stimulus was reversed in the  
831 following presentation period.

832

833 For simultaneous imaging in both SSp-bfd and VISp, we synchronized the visual and whisker stimulus  
834 temporally and spatially. In detail, as the light bar started moving from the bottom of the monitor (-15°),  
835 the metal bar started at the same time at the A-row of the whisker array. During the following 8 s the  
836 light bar moved to the top of the monitor meanwhile the metal bar moved in dorso-ventral direction  
837 towards the E-row of the whiskers. The synchronization was also maintained after the stimulus reversal.  
838 To investigate whether this bimodal sensory stimulation affects VISp or SSp-bfd activity, we performed  
839 imaging under unimodal visual stimulation in the same mice. Uni- and bimodal stimuli were presented  
840 in pseudorandom manner. Experiments in that we only stimulated the whiskers were performed in  
841 complete darkness.

842

843 From the recorded frames the signal was extracted by Fourier analysis at the stimulation frequency and  
844 converted into amplitude and phase maps using custom software (Kalatsky and Stryker, 2003). For data  
845 analysis we used MATLAB 2019-2022. In detail, from a pair of the upward and downward maps (visual  
846 or somatosensory), a map with absolute visuotopy or somatotopy and an average magnitude map was  
847 computed. The magnitude component represents the activation intensity of VISp or SSp-bfd. Since high  
848 levels of neuronal activity decrease oxygen levels supplied by hemoglobin and since deoxyhemoglobin  
849 absorbs more red light ( $610 \pm 2$  nm), the reflected light intensity decreases in active cortical regions.  
850 Because the reflectance changes are very small (less than 0.1%), all amplitudes are multiplied with  $10^4$ ,  
851 so that they can be presented as small positive numbers. Thus, the obtained values are dimensionless.  
852 For each stimulation condition we recorded at least three magnitudes of VISp (or SSp-bfd)  
853 responsiveness and averaged them for data presentation.

854

855 In another set of experiments whisker stimulation was performed using air puffs generated by a  
856 picospritzer. The air puffs were applied with a frequency of 2 Hz and a duration of 500 ms through a  
857 hollow needle directed to the whiskers on the left side of the snout from frontal. Great care was taken to  
858 direct the air puffs only to the whiskers and to avoid any stimulation of the fur on the mouse's head and  
859 body. Air puffs induced whisker deflections with an angle of about 20-25°. We recorded VISp responses  
860 in the absence and presence of air puffs. Cortical responses were again extracted by Fourier analysis as  
861 described above.

862

863 To examine whether the moving metal pole *per se* causes visual disturbances, we trimmed the whiskers  
864 on the left side of the snout in another group of mice using fine scissors and recoded VISp activation  
865 induced by the moving light bar in the absence and presence of the moving metal pole. Cortical  
866 responses of VISp were extracted by Fourier analysis as described above.

867

868 In another group of mice, we investigated whether the sound created by the air puffs cross-modally  
869 affected visually evoked VISp responses. For this, we again trimmed whiskers on the left side of the  
870 snout. Thus, applying air puffs (from the same frontal position as above) did not lead to whisker  
871 stimulation. We recorded VISp responses in the absence and presence of air puffs. Cortical responses  
872 were extracted by Fourier analysis as described above.

873

874 In another subset of experiments we investigated whether the loss of afferent whisker input to the brain  
875 cross-modally affects VISp responses. For this, we cut the infraorbital nerve (ION) on the left side of  
876 the snout by gently opening the skin using fine forceps and cutting the ION using fine scissors. A sham  
877 surgery was performed by opening the skin above the ION. Then the nerve was gently touched by the  
878 fine scissor but left intact. VISp responses were recorded before and after the sham surgery and the ION  
879 cut under simultaneous whisker stimulation using air puffs as described above.

880

### 881 **Immunohistochemistry**

882 The number of c-fos positive cells in different layers of VISp was examined in control mice with normal  
883 whiskers and mice with bilaterally removed whiskers (WD). Firstly, awake animals were dark adapted  
884 for 2 h. Subsequently, in WD mice all macrovibrissae were trimmed using an electric shave. This  
885 typically took 1-2 min. In control mice whiskers were sham trimmed by moving the electric shave  
886 through the whiskers while switched off. After this, mice were placed in an enriched environment for  
887 bimodal visual and somatosensory (in control mice) stimulation for 1.5 h. The environment was  
888 surrounded by four monitors showing a moving sine wave grating (0.1 cyc/deg, 100% contrast) for  
889 boosting visual stimulation. Simultaneous whisker stimulation (in control mice) was achieved by  
890 obstacles (paper roles, wood wool, brushes) placed on the bottom of the environment. Mice remained  
891 here for 1.5 h. Subsequently, animals were deeply anesthetized by an intraperitoneal injection of a

892 ketamine (100 mg/kg)/xylazine (16 mg/kg) solution. Animals were perfused transcardially using 100  
893 mM phosphate buffered saline (PBS) followed by 4% paraformaldehyde (PFA) in PBS. The removed  
894 brains were post fixed in 4% PFA and cryoprotected in 10% and 30% sucrose in PBS. Frozen sections  
895 of 20  $\mu$ m thickness were taken using a cryostat (Leica).

896

897 For 3,3'-diaminobenzidine (DAB) stainings sections were washed in PBS containing 0.2% TritonX and  
898 subsequently a peroxidase block (1% H<sub>2</sub>O<sub>2</sub> in PBS) was performed for 30 min. After blocking in 10%  
899 serum, 3% bovine serum albumin (BSA), and 0.2% TritonX-100 in PBS for 1 h, sections were incubated  
900 free floating with a primary antibody against c-fos (rabbit-anti-c-fos, 1:250, Santa Cruz) over night and  
901 at room temperature. After 1 h of incubation with a biotinylated secondary antibody (goat-anti-rabbit,  
902 1:1000, Vector) at room temperature, sections were washed in PBS. The DAB reaction usually took  
903 about 15 min and was performed in the absence of light. The reaction was stopped with PBS, the stained  
904 sections were embedded in mowiol (Roth) and sealed with a coverslip. The sections were observed using  
905 a bright field microscope (Olympus) using a 10 $\times$  objective and analyzed with ImageJ. We always used  
906 4–5 sections containing the anterior VISp or SSp-bfd of each animal and averaged the number of stained  
907 c-fos positive nuclei within the specific cortical area. The cortical region of the mouse visual and  
908 somatosensory cortex was determined on atlas basis (Wang et al., 2020)

909

910 For fluorescence immunohistological stainings cryosections were postfixed in 4% PFA for 30 min,  
911 washed in 0.2% TritonX-100 in PBS, blocked in 10% serum, 3% BSA, and 0.2% TritonX-100 in PBS  
912 for 1 h, followed by the incubation with the primary antibodies overnight. After washing, slices were  
913 incubated with the secondary antibody for 2 h. Following primary antibodies were used: rabbit-anti-c-  
914 fos (1:200, Santa Cruz), rabbit-anti-PV (1:1000, Abcam; directly labeled to Alexa 488 using a Zenon  
915 Rabbit IgG Labeling Kit) and goat-anti-SOM (1:100, Santa cruz). Following secondary antibodies were  
916 used: Alexa488 donkey-anti-rabbit (1:1000, Jackson Immuno Research), Cy3 donkey anti goat (1:1000;  
917 Jackson Immuno Research), Cy3 goat-anti-rabbit (1:1000, Jackson Immuno Research). After  
918 embedding slices in mowiol (Roth), pictures were scanned with a LSM510 (Zeiss) using a 20 $\times$  objective  
919 and analyzed with ImageJ. We used 4–5 sections of the anterior VISp per animal and counted the number  
920 of PV or SOM positive interneurons within VISp. This value was averaged throughout the 4–5 sections  
921 to obtain one value per animal. Next we counted the numbers of PV and SOM positive cells which also  
922 expressed c-fos. Thus, we could calculate the percentage amount of double-stained cells of all PVs or  
923 SOMs, respectively. Double labeled cells were always counted within single focal planes along the z-  
924 axis. During counting, we switched between the green (PV or c-fos) and red channel (SOM or c-fos) to  
925 ensure that we only took cells and nuclei at the same location and with a proper staining into count.  
926 Furthermore, we only counted cells which clearly displayed a typical cellular shape and size. The  
927 location of VISp was determined based on the Allen Reference Atlas (coronal, 2D) (Wang et al., 2020).

928

## 929 **Stereotaxic viral injections**

930 All surgical procedures, including the craniotomies, and virus injections, were carried out under  
931 isoflurane (2%–5%) and after carprofen (5 mg/kg, s.c.) had been administered. For virus injections, mice  
932 were anaesthetized under isoflurane (~2%) and craniotomies performed. Virus injection was performed  
933 using borosilicate glass injection pipettes (Wiretrol II; Drummond Scientific) pulled to a taper length of  
934 ~30 mm and a tip diameter of ~50  $\mu\text{m}$ . Viruses were delivered at a rate of 1–2 nl/s using Nanoject III  
935 (Drummond Scientific, USA). Viruses were injected at three cortical depths covering all layers of the  
936 VISp and SSp-bfd, respectively. After injections, the craniotomy was sealed with silicon (kwik-cast),  
937 the skin was resutured and animals were allowed to recover for 2–4 weeks. Injection coordinates for  
938 SSp-bfd and VISp were based on the Allen Reference Atlas (coronal, 2D) (Wang et al., 2020). For  
939 retrograde viral tracing we injected rAAV2-retro-EF1a-H2B-EGFP (Nuclear retro-AAV, titer:  $8.8 \times 10^{13}$   
940 GC per ml) or rAAV2-retro.CAG.GFP (Cellular retro-AAV, titer:  $5 \times 10^{13}$  GC per ml). For  
941 anterograde tracing, we injected AAV2/1-hSyn-Cre (titer:  $1.3 \times 10^{13}$  GC per ml). For functional  
942 connectivity experiments in acute slices, we injected either a mixture of 1:1 of AAV2/1-hSyn-Cre and  
943 AAV-2/1-CaMKIIa-hChR2(H134R)-EYFP or a mixture of 1:1 of AAV-2/1-CaMKIIa-hChR2(H134R)-  
944 EYFP and saline.

945  
946 For perfusions, mice were first deeply anaesthetized using a ketamine (200 mg/kg)/xylazine (20 mg/kg)  
947 mixture. A blunt needle was placed in the left ventricle, whilst an incision was performed in the right  
948 atrium of the heart. Following this, blood was first cleared using 100 mM PBS. Subsequently, the animal  
949 was perfused with saline containing 4% PFA. After successful fixation, the head was removed and the  
950 brain dissected out. The brain was further fixed in 4% PFA overnight at 4 °C, and then stored in 100  
951 mM PBS at 4 °C until ready for imaging.

952

## 953 **Brain wide serial two-photon imaging**

954 For serial section two-photon imaging, on the day of imaging, brains were removed from the PBS and  
955 dried. Brains were then embedded in agarose (4%) using a custom alignment mould to ensure that the  
956 brain was perpendicular to the imaging axis. The agarose block containing the brains were trimmed and  
957 then mounted onto the serial two photon microscope containing an integrated vibrating microtome and  
958 motorized x–y–z stage (Osten and Margrie, 2013; Ragan et al., 2012). For this, a custom system  
959 controlled by ScanImage (v5.6, Vidrio Technologies, USA) using BakingTray  
960 (<https://bakingtray.mouse.vision/>) was used. Imaging was performed using 920 nm illumination. Images  
961 were acquired with a  $2.3 \times 2.3 \mu\text{m}$  pixel size, and  $5 \mu\text{m}$  plane spacing. 8-10 optical planes were acquired  
962 over a depth of  $50 \mu\text{m}$  in total. To image the entire brain, images were acquired as tiles and stitched using  
963 StitchIt (<https://doi.org/10.5281/zenodo.3941901>). After each mosaic tile was imaged at all ten optical  
964 planes, the microtome automatically cut a  $50 \mu\text{m}$  slice, enabling imaging of the subsequent portions of

965 the sample and resulted in full 3D imaging of entire brains. All images were saved as a series of 2D  
966 TIFF files.

967

968 Images were registered to the Allen Mouse Brain Common Coordinate Framework (Wang et al., 2020)  
969 using the software brainreg (Tyson et al., 2022) based on the aMAP algorithm (Niedworok et al., 2016).  
970 All atlas data were provided by the BrainGlobe Atlas API (Claudi et al., 2021). For registration, the  
971 sample image data was initially down sampled to the voxel spacing of the atlas used and reoriented to  
972 align with the atlas orientation using bg-space (<https://doi.org/10.5281/zenodo.4552537>). The 10  $\mu\text{m}$   
973 atlas was used for cell detection and mapping. To manually segment structures within the brain (i.e.  
974 barrels in SSp-bfd) as well as analyse and summarize specific tissue volumes and viral injection sites,  
975 the software brainreg-segment (Tyson et al., 2022) was used. Automated cell detection and deep learning  
976 based cell classification was performed using the cellfinder software (Tyson et al., 2021) and cross-  
977 validated with manual annotation. All analysis in this manuscript was performed in atlas space (Wang  
978 et al., 2020).

979

980 Figures showing detected cells in 3D atlas space were generated using the brainrender software (Claudi  
981 et al., 2021) and custom scripts written in Python 3.9. The total number of detected brain cells varied  
982 from animal to animal. Therefore, cell numbers in different brain areas are reported as a fraction of the  
983 total number of cells per animal detected within the brain areas given in the specific diagrams. For  
984 comparison of the laminar distribution of cells within different brain areas, values were normalized to  
985 the total number of cells detected in each area. If not stated otherwise, diagrams always present the  
986 fraction of detected neurons in the hemisphere ipsilateral to the injection site. Dorsal views of cortical  
987 areas are maximum projections along the dorso-ventral axis.

988

989 To investigate the spatial distribution of cells in areas of interest (VISp, and L6 and L2/3 of SSp-bfd)  
990 we used principal component analysis (PCA). This aid us in determining the main directions over which  
991 the data were dispersed and enabling us to section each area spatially in a non-arbitrary manner. For  
992 analysis, we used the first two principal components (2D vectors). Mathematically, the first principal  
993 component is the direction in space along which projections have the largest variance. The second  
994 principal component is the direction which maximizes variance among all directions orthogonal to the  
995 first. To compute these components for each area, we first projected the cell position coordinates (3D)  
996 to the 2D spatial space of interest, pooled them from all corresponding mice, and then applied PCA. The  
997 pre-PCA projection to 2D space enabled direct mapping of the principal components to the spatial axes  
998 of our data (i.e. anatomical axes) thereby rendering them more intuitive. Of note, in our preliminary  
999 analysis, we obtained very similar results when computing PCA per mouse and then averaging over  
1000 mice for either of principal components. The variances explained by the first and second principal  
1001 components for our data were: [80%, 20%] for L2/3 of SSp-bfd, [65%, 35%] for L6 of SSp-bfd, and

1002 [61%, 39%] for VISp. The normalized amplitude of each plotted principle component shows its  
1003 explained variance relative to the other one. For this analysis, we used the *PCA* module of *Scikit-learn*  
1004 library in Python 3.9.

1005  
1006 For sectioning based on 1<sup>st</sup> principal component, using standard linear algebra techniques and the fact  
1007 that the 2<sup>nd</sup> principal component is orthogonal to the 1<sup>st</sup> one, we computed a set of lines (i.e. sections  
1008 borders) having a slope equal to that of 2<sup>nd</sup> principal component, and perpendicular to the virtual  
1009 expansion of 1<sup>st</sup> principal component (in 2D space, with same slope). Thus, sectioning lines are parallel  
1010 to each other and parallel to the 2<sup>nd</sup> principal component. We set the distance between each two lines  
1011 equal to 200 pixels, which was implemented by adjusting their y-intercepts. The sectioning based on 2<sup>nd</sup>  
1012 principal component was performed similarly and only used in combination with that of 1<sup>st</sup> principal  
1013 component for parcellation of horizontal projections of VISp neurons.

1014  
1015 To compute the smoothed cell density map of each area we evaluated a Gaussian kernel density on a 2D  
1016 regular grid with uniformly spaced x-coordinates and y-coordinates (the anatomical coordinates) in the  
1017 intervals limited to the maximum and minimum values of their coordinates. By sufficiently padding  
1018 these limits (or borders) we also relaxed the potential edge effects, and cut them off after applying the  
1019 Gaussian kernel. We applied these steps to each mouse separately and also determined the position of  
1020 its maximum density (2D). To compute an overall single map for each area of interest, we averaged over  
1021 corresponding mice. To better visualize the variation and the relative gradient of cell densities in 2D  
1022 space we also computed the contour lines of this map. The points on each contour line have the same  
1023 cell density, and the gradient of the cell density is always perpendicular to the contour lines where the  
1024 closer distance between the lines reflects a larger gradient (i.e. steeper variation in cell density). All  
1025 these steps were performed in Python 3.9. To create the spatial grid we used *mgrid* module of *numpy*  
1026 library with a step length of 58 (i.e.  $\sim 200/\sqrt{12}$ ) pixels. To apply the Gaussian kernel density we used *kde*  
1027 function in *stats* module of *scipy* library and enabled its automatic bandwidth determination method  
1028 called *scott*. To plot the density maps and contour lines we used *pcolormesh* and *contour* functions,  
1029 respectively, in *pyplot* module of *matplotlib* library. When using *contour* function, we enabled the option  
1030 for automatic selection of the number and position of the lines.

1031  
1032 To compute the fraction of cells in each barrel column, we first selected the barrels as region of interests  
1033 in Fiji (<https://fiji.sc/>) based on the reconstructed entire barrel field in layer 4, and then imported them  
1034 to Matlab 2020a (MathWorks) and created a mask for each barrel using *ReadImageJROI* and  
1035 *ROIs2Regions* functions (<https://github.com/DylanMuir/ReadImageJROI>), respectively. Next, for each  
1036 mouse we counted the number of cells located in each barrel, separately for layer 6a and layer 2/3. In  
1037 order to have the same scale over these layers, we computed the fraction of cells per barrel by dividing  
1038 its cell count by the total number of cells in both layers. To investigate which barrel has a cell count

1039 beyond the chance we performed a randomization test. To do this for each layer, we computed  
1040  $fr_b = (\#Cells_b / \#Cells_{tot}) \times (\#Area_{tot} / \#Area_b)$  as the relative fraction index of each barrel while  
1041 accounting for different barrel sizes;  $\#Cells_b$  and  $\#Area_b$  (resp.  $\#Area_b$  and  $\#Area_{tot}$ ) are the cell count  
1042 and number of pixels of barrel  $b$  (resp. of whole depicted barrel field). We then uniformly shuffled the  
1043 position of all cells in each layer over the whole barrel field and re-computed the relative fraction index  
1044 using the same formula and called it  $fr_b^{sh}$ . We repeated this step for 2500 times, yielding a distribution  
1045 of  $fr_b^{sh}$ . Finally, to assess how likely is to observe  $fr_b$  of each barrel in the randomized data, we adapted  
1046 one-tailed permutation test of Cohen thereby accounting for multiple comparison problem; the  
1047 significance level was set to 0.001.

1048  
1049 To assign visual space coordinates to postsynaptic neurons in VISp (horizontal projection), we first  
1050 parceled VISp into 31 subareas, based on sectioning along the 1<sup>st</sup> and 2<sup>nd</sup> PCs of the postsynaptic neuron  
1051 distribution (see above). After determining the average fraction of neurons within each parcel we  
1052 generated a color coded input map of VISp within the areal border of VISp from the CCFv3. This border  
1053 was then aligned with the mean field sign borders of VISp containing elevation and azimuth contour  
1054 plots (Zhuang et al., 2017). Subsequently, elevation and azimuth coordinates were assigned for each  
1055 parcel of VISp to estimate the extent of the modulated visual field based on the fraction of postsynaptic  
1056 neurons.

1057  
1058 **Optophysiology**

1059 The cutting solution for in vitro experiments contained 85 mM NaCl, 75 mM sucrose, 2.5 KCl, 24 mM  
1060 glucose, 1.25 mM NaH<sub>2</sub>PO<sub>4</sub>, 4 mM MgCl<sub>2</sub>, 0.5 mM CaCl<sub>2</sub> and 24 mM NaHCO<sub>3</sub> (310-325 mOsm,  
1061 bubbled with 95% (vol/vol) O<sub>2</sub>, 5% (vol/vol) CO<sub>2</sub>). Artificial cerebrospinal fluid (ACSF) contained  
1062 127 mM NaCl, 2.5 mM KCl, 26 mM NaHCO<sub>3</sub>, 2 mM CaCl<sub>2</sub>, 2 mM MgCl<sub>2</sub>, 1.25 mM NaH<sub>2</sub>PO<sub>4</sub> and  
1063 10 mM glucose (305-315 mOsm, bubbled with 95% (vol/vol) O<sub>2</sub>, 5% (vol/vol) CO<sub>2</sub>). Caesium-based  
1064 internal solution contained 122 mM CsMeSO<sub>4</sub>, 4 mM MgCl<sub>2</sub>, 10 mM HEPES, 4 mM Na-ATP, 0.4 mM  
1065 Na-GTP, 3 mM Na-L-ascorbate, 10 mM Na-phosphocreatine, 0.2 mM EGTA, 5 mM QX 314, and 0.03  
1066 mM Alexa 594 (pH 7.25, 295-300 mOsm). K-based internal solution contained 126 mM K-gluconate,  
1067 4 mM KCl, 10 mM HEPES, 4 mM Mg-ATP, 0.3 mM Na-GTP, 10 mM Na-phosphocreatine, 0.3%  
1068 (wt/vol) Neurobiotin tracer (pH 7.25, 295-300 mOsm).

1069  
1070 Acute brain slices were obtained on the day of in vitro experiments, as previously described (Weiler et  
1071 al., 2018). In brief, mice were deeply anesthetized with isoflurane (~2%) in a sealed container and  
1072 rapidly decapitated. Coronal sections of VISp (320  $\mu$ m) were cut in ice cold carbogenated cutting  
1073 solution using a vibratome (VT1200S, Leica). Slices were incubated in cutting solution in a submerged  
1074 chamber at 34°C for at least 45 min and then transferred to ACSF in a light-shielded submerged chamber

1075 at room temperature (21-25°C) until used for recordings. The expression patterns of ChR2-EGFP as  
1076 well as td-tomato within VISp and SSp-bfd were screened using fluorescence detection goggles (Dual  
1077 Fluorescent Protein Flashlight, Nightsea) with different excitation light (cyan and green) and filters during  
1078 the slice preparation. Only slices with visibly sufficient transduction of ChR2-EGFP were considered  
1079 for experiments. Brain slices were used for up to 6 h. A single brain slice was mounted on a poly-D-  
1080 lysine coated coverslip and then transferred to the recording chamber of the microscope while keeping  
1081 track of the rostro-caudal orientation of the slice. All recordings were performed at room temperature  
1082 (20-25 °C).

1083  
1084 Brain slice visualization and recordings were performed on an upright microscope (Scientifica Slice  
1085 Scope Pro 600) using infrared Differential Interference Contrast (DIC) with a low magnification  
1086 objective (4x objective lens) and images were acquired by a high-resolution digital CCD camera.

1087  
1088 VISp was identified using morphological landmarks and the presence of fluorescent axons. Whole cell  
1089 recordings were performed at high magnification using a 40x water-immersion objective. Targeted cell  
1090 bodies were at least 50 µm below the slice surface. Borosilicate glass patch pipettes (resistance of 4-5  
1091 MΩ) were filled with a Cs-based internal solution for measuring excitatory and inhibitory postsynaptic  
1092 currents in the same cell (EPSC: voltage clamp at -70 mV, IPSC: voltage clamp at 0 mV). K-based  
1093 internal solution was used when recording EPSC, postsynaptic potentials (EPSPs) and sub- and  
1094 suprathreshold electrophysiological properties. Basic electrophysiological properties were examined in  
1095 current-clamp mode with 1 s long hyper- and depolarizing current injections. Once stable recordings  
1096 with good access resistance were obtained (< 30 MΩ), recordings were started.

1097  
1098 Data were acquired with Multiclamp 700 B amplifiers (Axon Instruments). Voltage clamp recordings  
1099 were filtered at 10 kHz and digitized at 20 kHz. The software program wavesurfer  
1100 (<https://wavesurfer.janelia.org/index.html>) in MATLAB 2019b (Mathworks) was used for hardware  
1101 control and data acquisition.

1102  
1103 For ChR2 photostimulation, LED light was generated using a light emitting diode (LED) (470 nm) and  
1104 controlled by a CoolLED pE-300ultra system (CoolLED). Collimated light was delivered into the brain  
1105 tissue through the 40x objective. For the input mapping experiments, different trains of photostimuli  
1106 were delivered: (1) 5 pulses with 10 Hz and 100 ms duration of each pulse. (2) 25 pulses with 5 Hz and  
1107 10 ms duration. (3) 50 pulses with 10 Hz and 10 ms duration. The laser intensity for each pulse was set  
1108 to ~ 5mW/mm<sup>2</sup>. In a subset of recordings, tetrodotoxin (TTX, 1 µM, Merck) and 4-aminopyridine (4-  
1109 AP) (100 µM, Merck) was bath perfused to isolate direct monosynaptic inputs during photostimulation.

1110



1111 Intrinsic electrophysiological parameters were extracted using the PANDORA Toolbox (Gunay et al.,  
 1112 2009) and custom-written software in MATLAB 2019-2022. The suprathreshold single spike  
 1113 parameters were measured using the first spike evoked by current injection (at Rheobase). For  
 1114 photostimulation experiments, light evoked PSCs as well as PSPs were considered non-zero if their  
 1115 amplitudes were larger than 7 times the standard deviation of a 100 ms baseline directly before stimulus  
 1116 onset. Additionally, suprathreshold responses were only included if they occurred at least twice in  
 1117 photostimulation trains (2) and (3) (see above). The inflection points of the EPSCs and IPSCs were  
 1118 defined as the onsets and used to calculate the onset latencies with custom-written software in MATLAB  
 1119 2019-2022.

1120

### 1121 **Neuronal network modeling**

1122 To gain insights into the underlying network mechanism of active VISp suppression via SSp-bfd  
 1123 activation, we used computational modeling and mathematical stability analysis. To this end, we  
 1124 formulated neural dynamics of each cortical area using a well-established, canonical cortical recurrent  
 1125 neural network (RNN) model of mean firing activity rates of two spatially localized, homogeneous  
 1126 glutamatergic and GABAergic cells (here, pyramidal (PN) and fast-spiking (FS) populations; according)  
 1127 (Murphy and Miller, 2009; Tsodyks et al., 1998; Wilson and Cowan, 1972). This Wilson-Cowan-type  
 1128 model and its extensions have the advantage of being biophysically interpretable, mathematically  
 1129 accessible and amenable to replicate the behavior of spiking models, and has been used extensively in  
 1130 previous studies to explain the behavior and underlying mechanisms of cortical networks (Murphy and  
 1131 Miller, 2009; Ozeki et al., 2009; Rahmati et al., 2017; Tsodyks et al., 1998; Tsodyks et al., 1997). We  
 1132 connected, extended and parameterized the two RNNs (i.e. two pairs of PN-FS populations) based on  
 1133 our present data and previous studies (see below). In the following, we first formulate the model  
 1134 dynamics mathematically and extend it to account for our observed cross-modal input, outline the  
 1135 rationale of model parameterization in the present work, describe the applied stability analysis including  
 1136 the operating regimes, and finally define the quantities which we extracted from our modeling results.  
 1137 For brevity, hereafter, in the mathematical expressions we refer to VISp and SSp-bfd regions as V and  
 1138 S (mainly as superscripts like  $RNN^V$  and  $RNN^S$ ), and to PN and FS as P and F.

1139 *Model description and extension.* The equations governing the mean-field dynamics of the  $RNN^S$  over  
 1140 time are (dots denote the time derivatives) (Tsodyks et al., 1997; Wilson and Cowan, 1972):

$$\begin{aligned}
 1141 \quad \tau_p^S \dot{A}_p^S(t) &= -A_p^S(t) + f_p^S \left( J_{pp}^S A_p^S(t) - J_{pf}^S A_f^S(t) + I_p^S(t) \right) = -A_p^S(t) + f_p^S \left( h_p^S \right) \\
 \tau_f^S \dot{A}_f^S(t) &= -A_f^S(t) + f_f^S \left( J_{fp}^S A_p^S(t) - J_{ff}^S A_f^S(t) + I_f^S(t) \right) = -A_f^S(t) + f_f^S \left( h_f^S \right)
 \end{aligned} \tag{1}$$

1142 where  $A_p^S(t)$  and  $A_f^S(t)$  are the average activity rates (in Hz) of PN and FS populations which can be  
 1143 properly scaled to represent locally the average recorded activities in these populations,  $\tau_p^S$  and  $\tau_f^S$  are

1144 the time-constants of PN and FS populations' firing activities to approach their steady states,  $J_{ij}^S$  ( $i$  and  
 1145  $j \in \{P, F\}$ ) are the average synaptic weights of recurrent ( $i=j$ ) or feedback ( $i \neq j$ ;  $j \rightarrow i$ ) connections  
 1146 within SSp-bfd, and  $I_P^S(t)$  and  $I_F^S(t)$  are the external inputs received by SSp-bfd's PC and FS  
 1147 populations from other brain regions or via stimulation. All synaptic weights have positive values.  
 1148  
 1149 The RNN<sup>V</sup> population dynamics can be described similarly to Eq. 1. However, here, we extend this  
 1150 regional model in order to account for the observed cross-modal projection and its different postsynaptic  
 1151 effects (depolarizing vs. excitatory), as observed in our data:

$$1152 \begin{aligned} \tau_P^V \dot{A}_P^V(t) &= -A_P^V(t) + f_P^V \left( J_{PP}^V A_P^V(t) - J_{PF}^V A_F^V(t) + I_P^{VS}(t) + I_P^V(t) \right) = -A_P^V(t) + f_P^V \left( h_P^V \right) \\ \tau_F^V \dot{A}_F^V(t) &= -A_F^V(t) + f_F^V \left( J_{FP}^V A_P^V(t) - J_{FF}^V A_F^V(t) + I_F^{VS}(t) + I_F^V(t) \right) = -A_F^V(t) + f_F^V \left( h_F^V \right) \end{aligned} \quad (2)$$

1153 where  $I_P^V(t)$  and  $I_F^V(t)$  are the external inputs received by VISp's populations from other brain regions  
 1154 than SSp-bfd or via stimulation, and  $I_P^{VS}(t)$  and  $I_F^{VS}(t)$  are the glutamatergic synaptic-inputs from SSp-  
 1155 bfd's PN population onto VISp's PN and FS populations with corresponding average synaptic weights  
 1156  $J_{PP}^{VS}$  and  $J_{FP}^{VS}$ , respectively, which we modeled as:

$$1157 I_i^{VS}(t) = \left[ \min \left( J_{iP}^{VS} A_P^S(t), \delta \theta_i^V \right) \right]_+ = \left[ h_{iP}^{VS} \right]_+ \quad (3)$$

1158 where  $[\ ]_+$  is a threshold-linear function formulated as  $\left[ h_{iP}^{VS} \right]_+ = \max \left( h_{iP}^{VS}, 0 \right)$ , and we defined  $\delta$  as a  
 1159 positive constant controlling the depolarizing or excitatory action of the cross-modal input (see next  
 1160 section for its parameterization). In both Eqs. 1 and 2, the transformation from the summed input to each  
 1161 population ( $h_i^r$ ) to an activity output (in Hz) is governed by the response function ( $f_i^r$ ) defined  
 1162 as (Rahmati et al., 2017; Tsodyks et al., 1998)

$$1163 f_i^r \left( h_i^r \right) = \begin{cases} 0 & \text{for } h_i^r \leq \theta_i^r \\ G_i^r \left( h_i^r - \theta_i^r \right) & \text{for } \theta_i^r < h_i^r \end{cases} \quad (4)$$

1164 where  $r \in \{V, S\}$ ,  $\theta_i^r$  is the population activity-threshold, and  $G_i^r$  is the linear input-output gain. The  
 1165 effective weights of the synaptic projection in the active mode ( $\theta_i^r < h_i^r$ ) can be defined as  $w_{ij}^r = G_i^r J_{ij}^r$   
 1166 and  $w_{iP}^{VS} = G_i^V J_{iP}^{VS}$ , where again  $i$  and  $j$  refer to post- and presynaptic populations, respectively.  
 1167 Similarly, we define the effective values of external inputs ( $I_P^r$  and  $I_F^r$ ) as  $\varepsilon_i^r(t) = G_i^r I_i^r(t)$ .

1168 *Parameterization.* To set the parameter values of each RNN we mainly followed previous studies  
1169 (Murphy and Miller, 2009; Ozeki et al., 2009; Rahmati et al., 2017; Tsodyks et al., 1997), and used our  
1170 experimental data to qualitatively constrain the parameterization of our cross-modal network model  
1171 (Eqs. 1-4), as follows. (i) Since EPSCs mediated by SSp-bfd onto VISp's PN and FS populations  
1172 exhibited similar amplitudes, we considered  $J^{VS} = J_{FP}^{VS} = J_{PP}^{VS}$ , thus  $I^{VS} = I_P^{VS} = I_F^{VS} \geq 0$ . (ii) Since  
1173 these EPSC amplitudes onto VISp's PN did not change in presence of TTX+4-AP, we considered  
1174  $J^{VS} = J_{PP}^V$ . (iii) Since the evoked IPSCs (mediated locally by FS INs within VISp, following the  
1175 activation of axonal fibers from SSp-bfd) onto VISp's PNs were around two times bigger  
1176 than the evoked EPSCs, we considered  $J_{PF}^V = \alpha J^{VS}$  (similarly,  $J_{PF}^V = \alpha J_{PP}^V$ ) with  $\alpha = 2$ ; where,  $\alpha$  is  
1177 analogous to 1 over I/E ratio. (iv) Since the VISp's FS INs, as compared to PNs, exhibited higher  
1178 intrinsic excitability (smaller difference between RMP and AP-threshold and less negative RMP) we  
1179 considered  $\theta_F^V < \theta_P^V$ , where in accordance to our data we set  $\theta_F^V = 0.75\theta_P^V$  with  $\theta_P^V = 0.5$ . (v) Since  
1180 FS INs exhibited a much higher gain than PNs, we considered  $G_F^V > G_P^V$  and set their default values  
1181 proportionally, in accordance to our data, as  $G_F^V = 5$  and  $G_P^V = 1$ . (vi) Since the glutamatergic  
1182 projection from SSp-bfd onto VISp' PNs was depolarizing rather than excitatory, we set an upper-limit  
1183 on  $I^{VS}$  using Eq. 3, defined as  $0 \leq (I^{VS} = I_P^{VS} = I_F^{VS}) \leq \delta\theta_P^V$ . Here, we set  $\delta = 1$  so that the isolated  
1184 effect of  $I^{VS}$  on PNs will be depolarizing only; i.e. to be smaller than the population activity-threshold  
1185 of PN population,  $\theta_P^V$  (see Eq. 4). This modeling enables  $I^{VS}$  to act as both excitatory/depolarizing on  
1186 VISp' FS INs since  $\theta_F^V < \theta_P^V$  (see iv). Intuitively, whereas the strongest action of  $I^{VS}$  alone on the PN  
1187 population is just to bring it closer to the active mode, the same  $I^{VS}$  can even enable firing of FS  
1188 population (if  $I^{VS} > \theta_F^V$ ). Of note, in our preliminary analysis we obtained very similar results by setting  
1189 e.g.  $\delta = 1.1$  (dominantly depolarizing and moderately excitatory). (vii) Finally, to provide a clearer  
1190 representation of our main modeling results about the suppression phenomenon as well as to avoid fine-  
1191 tuning of parameter values, we made, without losing the generality, the following two assumptions.  
1192 First, we forwent the potential regional differences in the parameter values as we built our cross-modal  
1193 network model based on the canonical cortical RNN model used to model either of regions (see above).  
1194 Nonetheless, our preliminary analysis showed that this assumption could be also neglected since the  
1195 main role of RNNs in this context is to drive the cross-modal input and thus, could be modeled by  
1196 considering only its cross-modal inputs to RNN<sup>v</sup> (e.g. like a stimulus). Second, we assumed that the  
1197 intra-areal glutamatergic projections (PN→PN and PN→FS) and GABAergic projections (FS→FS and  
1198 FS→PN) have the same effective weights, separately (see also e.g. (Murphy and Miller, 2009; Rahmati  
1199 et al., 2017)):  $w_{PP}^r = w_{FP}^r$  and  $w_{PF}^r = w_{FF}^r$ ; although, note that the (non-effective) synaptic weight

1200  $J_{PP}^r = w_{PP}^r / G_P^r$  (resp.  $J_{FF}^r = w_{FF}^r / G_F^r$ ) is not necessarily equal to  $J_{FP}^r = w_{FP}^r / G_F^r$  (resp.  
 1201  $J_{PF}^r = w_{PF}^r / G_P^r$ ) since  $G_P^r$  and  $G_F^r$  can have different values (as in the present work). Of note, in our  
 1202 preliminary results, we observed that our main findings remained largely intact even without these  
 1203 assumptions. Despite, considering these assumptions enabled us to specifically focus on and encapsulate  
 1204 the corresponding effect of gains on processing of cross-modal input in VISp. Accordingly, we  
 1205 considered  $\tau_P = \tau_P^r$ ,  $\tau_F = \tau_F^r$ ,  $\theta_P = \theta_P^r$ ,  $\theta_F = \theta_F^r$ ,  $G_P = G_P^r$ ,  $G_F = G_F^r$ ,  $w_P = w_{PP}^r = w_{FP}^r$ , and  
 1206  $w_F = w_{FF}^r = w_{PF}^r$ , where  $r \in \{V, S\}$ . Consistent to previous studies (Murphy and Miller, 2009; Ozeki et  
 1207 al., 2009; Rahmati et al., 2017), we set  $\tau_P = 60\text{ms}$ ,  $\tau_F = 12\text{ms}$ , and  $w_P = 2$ . Then, according to our  
 1208 aforementioned constraints we obtain:  $w_{iP}^{VS} = 2$ , and  $w_F = 4$ . The rest of parameter values can be set  
 1209 according to the aforementioned description. In addition, note that when investigating the effect of  
 1210 VISp's population-gains on the suppression we varied  $G_P^V$  and  $G_F^V$  values independently from SSp-  
 1211 bfd's firing gains (i.e.  $G_P^S$  and  $G_F^S$  were kept at their default values 1 and 5, respectively; see point v).  
 1212 This allowed us to specifically assess the significance of firing gains of VISp's populations on the  
 1213 suppression phenomenon independently from the effect of SSp-bfd's gains, as this strategy keeps the  
 1214 amount of cross-modal input the same. In our simulations, we set the effective values of external inputs  
 1215 to  $\varepsilon_P^S = \varepsilon_P^V = 5.5$  and  $\varepsilon_F^S = \varepsilon_F^V = 5$  with the onset and offset times illustrated in **Figure 7B**. For each  
 1216 region, the inputs to PN and FS populations were applied (and ceased) simultaneously.

1217 *Phase plane and fixed point.* To visualize the stability behavior of  $RNN^V$  model, we used the phase  
 1218 plane analysis based on the activity rates:  $A_{FS}$ - $A_{PN}$ -plane. The  $A_{FS}$ - $A_{PN}$ -plane sketch includes the curves  
 1219 of the  $A_{PN}$ - and  $A_{FS}$ -nullclines representing sets of points for which  $\dot{A}_P^V(t) = 0$  and  $\dot{A}_F^V(t) = 0$ . Any  
 1220 intersection of these nullclines is called a fixed point (FP or steady state), with the stability needed to be  
 1221 determined (see the following text). The FP represents the steady state levels of  $RNN^V$  population  
 1222 activities ( $A_{P,ss}^V$  and  $A_{F,ss}^V$ ; constant values) in presence of a sufficiently long-lasting external (visual  
 1223 stimulation) and/or cross-modal inputs. The two FPs in our results are approached during visual  
 1224 stimulation (v;  $FP_v$ ) or visual+tactile stimulations (v + w;  $FP_{v+w}$ ) at the corresponding steady state of the  
 1225 network. Note that at the FP(s) the cross-modal input can be considered to have approached its steady  
 1226 state value:  $I_i^{VS}(t) = I_{i,ss}^{VS} = \left[ \min \left( J_{iP}^{VS} A_{P,ss}^S, \delta \theta_P^V \right) \right]_+$ . Accordingly, to plot the  $A_{FS}$ - $A_{PN}$ -plane we can  
 1227 substitute the  $I_i^{VS}(t)$  with its steady state value  $I_{i,ss}^{VS}$ , thus only solve the  $\dot{A}_P^V(t) = 0$  and  $\dot{A}_F^V(t) = 0$   
 1228 equations; i.e. decouple Eqs. 1 and 2. Different levels of  $I_{i,ss}^{VS}$  can mainly push the nullclines up or down  
 1229 in the  $A_{FS}$ - $A_{PN}$ -plane, without changing their slopes. To determine the stability of each FP we applied  
 1230 the linear stability analysis to  $RNN^V$  system of equations in Eq. 2 while considering  $I_i^{VS}(t) = I_{i,ss}^{VS}$ : We

1231 investigated whether all eigenvalues of the corresponding Jacobian matrix have strictly negative real  
1232 parts (if so, the FP is stable), or whether at least one eigenvalue with a positive real part exists (if so, the  
1233 FP is unstable). The details about plotting the phase planes and stability analysis have been described in  
1234 previous studies (Ozeki et al., 2009; Rahmati et al., 2017; Tsodyks et al., 1997).

1235 *Operating regimes.* The stable operating regimes of a RNN at a FP can be classified as an inhibition-  
1236 stabilized network (ISN) vs. a Non-ISN (Ozeki et al., 2009; Rahmati et al., 2017; Tsodyks et al., 1997).  
1237 To apply this theoretical classification to the RNN<sup>V</sup> model we applied the previously described  
1238 analytical and numerical techniques (for details see (Ozeki et al., 2009; Rahmati et al., 2017)) to Eq. 1  
1239 while considering  $I_i^{VS}(t) = I_{i,ss}^{VS}$  (see previous paragraph). In brief, to discriminate between these two  
1240 regimes three criteria were defined: (A) Excitatory instability: For the inhibitory activity (here of FS-  
1241 population) rate fixed at the FP, the recurrent excitation is strong enough to render the PN-population  
1242 intrinsically unstable. (B) Excitatory stability: In contrast to (A), the PN-population is stable per se, i.e.  
1243 even with a feedback inhibition fixed at its level at the FP. (C) Overall stability: The dynamic feedback  
1244 inhibition to the PN-population is strong enough to stabilize the whole network activity. At a FP, a  
1245 network operating under the (A) and (C) criteria is an ISN, while a network operating under the (B) and  
1246 (C) criteria is a Non-ISN. A network, which is neither ISN nor Non-ISN at the FP, operates under an  
1247 unstable regime. In the  $A_{FS}$ - $A_{PN}$ -plane, (A) and (B) render the slope of  $A_{PN}$ -nullcline positive and  
1248 negative, respectively. Under (C), the slope of  $A_{FS}$ -nullcline (positive) is bigger than the slope of  $A_{PN}$ -  
1249 nullcline at the FP. RNN<sup>V</sup> operates as an ISN at the FPs shown in our results, since both  $A_{PN}$ - and  $A_{FS}$ -  
1250 nullclines have positive slopes and  $A_{FS}$ -nullcline's slope is steeper (Ozeki et al., 2009; Rahmati et al.,  
1251 2017).

1252 *Simulations.* All modeling simulations in this paper have been implemented as Wolfram Mathematica  
1253 13 and Matlab 2020a (MathWorks) code. For network simulations, we set the integration time-step size  
1254 to 0.0001 s. The initial values of cross-model network's variables were set to 0, and it was simulated for  
1255 15 seconds; i.e. 5 seconds under each external input configuration, thereby assuring the convergence of  
1256 firing activities to their steady states under each configuration. For RNN<sup>V</sup>, the input order was:  
1257 initialization (no input), v only, and v + w. Accordingly, the RNN<sup>S</sup> was simulated 10 seconds without  
1258 input, and then the tactile-resembling input (w) was added.

1259  
1260 *Additional quantities.* We quantified the change in RNN<sup>V</sup> activity under the presence of cross-modal  
1261 input as the difference between the steady-state value of its sum activity during v + w stimulation ( $A_{Sum,ss}^{V, v+w}$ )  
1262 and that during v-only stimulation ( $A_{Sum,ss}^{V, v-only}$ ), i.e.  $\xi = A_{Sum,ss}^{V, v+w} - A_{Sum,ss}^{V, v-only}$ ;  $\xi < 0$ : suppression,  
1263  $\xi > 0$ : no suppression (e.g. facilitation),  $\xi = 0$ : unchanged. Both absolute and relative amplification  
1264 parameters quantify the strength of the transient increase in RNN<sup>V</sup>'s PN activity (before its overall  
1265 suppression) upon the onset of tactile stimulation. We formulated these parameters as

1266  $\text{amp}_{\text{abs}} = \max(A_{\text{P,ss}}^{\text{V,v}}, 0)$  and  $\text{amp}_{\text{rel}} = 100 \max\left(\left(A_{\text{P}}^{\text{V,w+v}}(t) - A_{\text{P,ss}}^{\text{V,v}}\right) / A_{\text{P,ss}}^{\text{V,v}}, 0\right)$ , respectively, where  $A_{\text{P}}^{\text{V,w+v}}$   
1267 and  $A_{\text{P,ss}}^{\text{V,v-only}}$  are the running value and the steady state value of PN activity during the corresponding  
1268 stimulations (see their superscripts). We showed these parameters in dB, while considering the values  
1269 of 0 (i.e. no amplification) as undefined. Finally, to quantify the effective time of RNN<sup>V</sup>'s FS-mediated  
1270 inhibition to gain up, we subtracted the peak-time of  $A_{\text{F}}^{\text{V,w+v}}$  from that of the transient amplification in  
1271 RNN<sup>V</sup>'s PN activity ( $A_{\text{P}}^{\text{V,w+v}}$ ) under v + w stimulation.

1272

### 1273 **Statistical analysis**

1274 Details of all  $n$  numbers and statistical analysis are provided in all figure captions. The required sample  
1275 sizes were estimated based on literature and our past experience performing similar experiments.  
1276 Significance level was typically set as  $p < 0.05$  if not stated otherwise. Statistical analyses were performed  
1277 using GraphPad Prism v.9, MATLAB 2019-2022 and Python 3.9.

1278

## 1279 5 References

- 1280 Bieler, M., Sieben, K., Cichon, N., Schildt, S., Roder, B., and Hanganu-Opatz, I.L. (2017). Rate and Temporal  
1281 Coding Convey Multisensory Information in Primary Sensory Cortices. *eNeuro* 4.  
1282 Bolanos, L.A., Xiao, D., Ford, N.L., LeDue, J.M., Gupta, P.K., Doebeli, C., Hu, H., Rhodin, H., and Murphy, T.H.  
1283 (2021). A three-dimensional virtual mouse generates synthetic training data for behavioral analysis. *Nat Methods*  
1284 18, 378-381.  
1285 Bortone, D.S., Olsen, S.R., and Scanziani, M. (2014). Translaminar inhibitory cells recruited by layer 6  
1286 corticothalamic neurons suppress visual cortex. *Neuron* 82, 474-485.  
1287 Briggs, F. (2010). Organizing principles of cortical layer 6. *Front Neural Circuits* 4, 3.  
1288 Claudi, F., Tyson, A.L., Petrucco, L., Margrie, T.W., Portugues, R., and Branco, T. (2021). Visualizing  
1289 anatomically registered data with brainrender. *Elife* 10.  
1290 Crandall, S.R., Patrick, S.L., Cruikshank, S.J., and Connors, B.W. (2017). Infrabarrels Are Layer 6 Circuit  
1291 Modules in the Barrel Cortex that Link Long-Range Inputs and Outputs. *Cell Rep* 21, 3065-3078.  
1292 Das, A., and Gilbert, C.D. (1995). Long-range horizontal connections and their role in cortical reorganization  
1293 revealed by optical recording of cat primary visual cortex. *Nature* 375, 780-784.  
1294 Deneux, T., Harrell, E.R., Kempf, A., Ceballos, S., Filipchuk, A., and Bathellier, B. (2019). Context-dependent  
1295 signaling of coincident auditory and visual events in primary visual cortex. *Elife* 8.  
1296 Dougill, G., Starostin, E.L., Milne, A.O., van der Heijden, G.H.M., Goss, V.G.A., and Grant, R.A. (2020).  
1297 Ecomorphology reveals Euler spiral of mammalian whiskers. *J Morphol* 281, 1271-1279.  
1298 Drager, U.C. (1975). Receptive fields of single cells and topography in mouse visual cortex. *J Comp Neurol* 160,  
1299 269-290.  
1300 Drager, U.C., and Hubel, D.H. (1975). Physiology of visual cells in mouse superior colliculus and correlation with  
1301 somatosensory and auditory input. *Nature* 253, 203-204.  
1302 Egger, R., Narayanan, R.T., Guest, J.M., Bast, A., Udvary, D., Messori, L.F., Das, S., de Kock, C.P.J., and  
1303 Oberlaender, M. (2020). Cortical Output Is Gated by Horizontally Projecting Neurons in the Deep Layers. *Neuron*  
1304 105, 122-137 e128.  
1305 Ernst, M.O., and Banks, M.S. (2002). Humans integrate visual and haptic information in a statistically optimal  
1306 fashion. *Nature* 415, 429-433.  
1307 Fehervari, T.D., Okazaki, Y., Sawai, H., and Yagi, T. (2015). In Vivo Voltage-Sensitive Dye Study of Lateral  
1308 Spreading of Cortical Activity in Mouse Primary Visual Cortex Induced by a Current Impulse. *PLoS One* 10,  
1309 e0133853.  
1310 Felleman, D.J., and Van Essen, D.C. (1991). Distributed hierarchical processing in the primate cerebral cortex.  
1311 *Cereb Cortex* 1, 1-47.  
1312 Ferguson, K.A., and Cardin, J.A. (2020). Mechanisms underlying gain modulation in the cortex. *Nat Rev Neurosci*  
1313 21, 80-92.  
1314 Garrett, M.E., Nauhaus, I., Marshel, J.H., and Callaway, E.M. (2014). Topography and areal organization of mouse  
1315 visual cortex. *J Neurosci* 34, 12587-12600.  
1316 Gielen, S.C., Schmidt, R.A., and Van den Heuvel, P.J. (1983). On the nature of intersensory facilitation of reaction  
1317 time. *Percept Psychophys* 34, 161-168.  
1318 Gleiss, S., and Kayser, C. (2014). Acoustic noise improves visual perception and modulates occipital oscillatory  
1319 states. *J Cogn Neurosci* 26, 699-711.  
1320 Glickfeld, L.L., and Olsen, S.R. (2017). Higher-Order Areas of the Mouse Visual Cortex. *Annu Rev Vis Sci* 3,  
1321 251-273.  
1322 Gotz, T., Hanke, D., Huonker, R., Weiss, T., Klingner, C., Brodoehl, S., Baumbach, P., and Witte, O.W. (2017).  
1323 The Influence of Eye Closure on Somatosensory Discrimination: A Trade-off Between Simple Perception and  
1324 Discrimination. *Cereb Cortex* 27, 3231-3239.  
1325 Grant, R.A., Mitchinson, B., Fox, C.W., and Prescott, T.J. (2009). Active touch sensing in the rat: anticipatory and  
1326 regulatory control of whisker movements during surface exploration. *J Neurophysiol* 101, 862-874.  
1327 Gunay, C., Edgerton, J.R., Li, S., Sangrey, T., Prinz, A.A., and Jaeger, D. (2009). Database analysis of simulated  
1328 and recorded electrophysiological datasets with PANDORA's toolbox. *Neuroinformatics* 7, 93-111.  
1329 Heist, S., Dietrich, P., Landmann, M., Kuhmstedt, P., Notni, G., and Tunnermann, A. (2018). GOBO projection  
1330 for 3D measurements at highest frame rates: a performance analysis. *Light Sci Appl* 7, 71.  
1331 Holmes, N.P., and Spence, C. (2005). Multisensory integration: space, time and superadditivity. *Curr Biol* 15,  
1332 R762-764.  
1333 Hovde, K., Gianatti, M., Witter, M.P., and Whitlock, J.R. (2019). Architecture and organization of mouse posterior  
1334 parietal cortex relative to extrastriate areas. *Eur J Neurosci* 49, 1313-1329.  
1335 Huet, L.A., and Hartmann, M.J. (2014). The search space of the rat during whisking behavior. *J Exp Biol* 217,  
1336 3365-3376.

- 1337 Ibrahim, L.A., Mesik, L., Ji, X.Y., Fang, Q., Li, H.F., Li, Y.T., Zingg, B., Zhang, L.I., and Tao, H.W. (2016).  
1338 Cross-Modality Sharpening of Visual Cortical Processing through Layer-1-Mediated Inhibition and Disinhibition.  
1339 *Neuron* 89, 1031-1045.
- 1340 Ide, M., Hidaka, S., Ikeda, H., and Wada, M. (2016). Neural mechanisms underlying touch-induced visual  
1341 perceptual suppression: An fMRI study. *Sci Rep* 6, 37301.
- 1342 Iurilli, G., Ghezzi, D., Olcese, U., Lassi, G., Nazzaro, C., Tonini, R., Tucci, V., Benfenati, F., and Medini, P.  
1343 (2012). Sound-driven synaptic inhibition in primary visual cortex. *Neuron* 73, 814-828.
- 1344 Jones, E.G., and Powell, T.P. (1970). An anatomical study of converging sensory pathways within the cerebral  
1345 cortex of the monkey. *Brain* 93, 793-820.
- 1346 Kalatsky, V.A., and Stryker, M.P. (2003). New paradigm for optical imaging: temporally encoded maps of intrinsic  
1347 signal. *Neuron* 38, 529-545.
- 1348 Kayser, C., Petkov, C.I., and Logothetis, N.K. (2008). Visual modulation of neurons in auditory cortex. *Cereb*  
1349 *Cortex* 18, 1560-1574.
- 1350 Kirkwood, A. (2015). Balancing excitation and inhibition. *Neuron* 86, 348-350.
- 1351 La Chioma, A., Bonhoeffer, T., and Hubener, M. (2019). Area-Specific Mapping of Binocular Disparity across  
1352 Mouse Visual Cortex. *Curr Biol* 29, 2954-2960 e2955.
- 1353 Laboy-Juarez, K.J., Langberg, T., Ahn, S., and Feldman, D.E. (2019). Elementary motion sequence detectors in  
1354 whisker somatosensory cortex. *Nat Neurosci* 22, 1438-1449.
- 1355 Liang, Y., Fan, J.L., Sun, W., Lu, R., Chen, M., and Ji, N. (2021). A Distinct Population of L6 Neurons in Mouse  
1356 V1 Mediate Cross-Callosal Communication. *Cereb Cortex* 31, 4259-4273.
- 1357 Lohse, M., Dahmen, J.C., Bajo, V.M., and King, A.J. (2021). Subcortical circuits mediate communication between  
1358 primary sensory cortical areas in mice. *Nature Communications* 12.
- 1359 Masse, I.O., Ross, S., Bronchti, G., and Boire, D. (2017). Asymmetric Direct Reciprocal Connections Between  
1360 Primary Visual and Somatosensory Cortices of the Mouse. *Cereb Cortex* 27, 4361-4378.
- 1361 Meredith, M.A., and Allman, B.L. (2015). Single-unit analysis of somatosensory processing in the core auditory  
1362 cortex of hearing ferrets. *Eur J Neurosci* 41, 686-698.
- 1363 Meredith, M.A., and Stein, B.E. (1983). Interactions among converging sensory inputs in the superior colliculus.  
1364 *Science* 221, 389-391.
- 1365 Meyer, A.F., O'Keefe, J., and Poort, J. (2020). Two Distinct Types of Eye-Head Coupling in Freely Moving Mice.  
1366 *Curr Biol* 30, 2116-2130 e2116.
- 1367 Michaiel, A.M., Abe, E.T.T., and Niell, C.M. (2020). Dynamics of gaze control during prey capture in freely  
1368 moving mice. *Elife* 9.
- 1369 Murphy, B.K., and Miller, K.D. (2009). Balanced amplification: a new mechanism of selective amplification of  
1370 neural activity patterns. *Neuron* 61, 635-648.
- 1371 Naskar, S., Qi, J., Pereira, F., Gerfen, C.R., and Lee, S. (2021). Cell-type-specific recruitment of GABAergic  
1372 interneurons in the primary somatosensory cortex by long-range inputs. *Cell Rep* 34, 108774.
- 1373 Niedworok, C.J., Brown, A.P., Jorge Cardoso, M., Osten, P., Ourselin, S., Modat, M., and Margrie, T.W. (2016).  
1374 aMAP is a validated pipeline for registration and segmentation of high-resolution mouse brain data. *Nat Commun*  
1375 7, 11879.
- 1376 Nikbakht, N., Tafreshiha, A., Zoccolan, D., and Diamond, M.E. (2018). Supralinear and Supramodal Integration  
1377 of Visual and Tactile Signals in Rats: Psychophysics and Neuronal Mechanisms. *Neuron* 97, 626-639 e628.
- 1378 Olcese, U., Iurilli, G., and Medini, P. (2013). Cellular and synaptic architecture of multisensory integration in the  
1379 mouse neocortex. *Neuron* 79, 579-593.
- 1380 Orbach, H.S., and Van Essen, D.C. (1993). In vivo tracing of pathways and spatio-temporal activity patterns in rat  
1381 visual cortex using voltage sensitive dyes. *Exp Brain Res* 94, 371-392.
- 1382 Osten, P., and Margrie, T.W. (2013). Mapping brain circuitry with a light microscope. *Nat Methods* 10, 515-523.
- 1383 Ozeki, H., Finn, I.M., Schaffer, E.S., Miller, K.D., and Ferster, D. (2009). Inhibitory stabilization of the cortical  
1384 network underlies visual surround suppression. *Neuron* 62, 578-592.
- 1385 Petersen, C.C. (2014). Cortical control of whisker movement. *Annu Rev Neurosci* 37, 183-203.
- 1386 Petersen, C.C.H. (2019). Sensorimotor processing in the rodent barrel cortex. *Nat Rev Neurosci* 20, 533-546.
- 1387 Petersen, R.S., Colins Rodriguez, A., Evans, M.H., Campagner, D., and Loft, M.S.E. (2020). A system for tracking  
1388 whisker kinematics and whisker shape in three dimensions. *PLoS Comput Biol* 16, e1007402.
- 1389 Ragan, T., Kadiri, L.R., Venkataraju, K.U., Bahlmann, K., Sutin, J., Taranda, J., Arganda-Carreras, I., Kim, Y.,  
1390 Seung, H.S., and Osten, P. (2012). Serial two-photon tomography for automated ex vivo mouse brain imaging.  
1391 *Nat Methods* 9, 255-258.
- 1392 Rahmati, V., Kirmse, K., Holthoff, K., Schwabe, L., and Kiebel, S.J. (2017). Developmental Emergence of Sparse  
1393 Coding: A Dynamic Systems Approach. *Sci Rep* 7, 13015.
- 1394 Rao, R.P., Mielke, F., Bobrov, E., and Brecht, M. (2014). Vocalization-whisking coordination and multisensory  
1395 integration of social signals in rat auditory cortex. *Elife* 3.
- 1396 Renard, A., Harrell, E.R., and Bathellier, B. (2022). Olfactory modulation of barrel cortex activity during active  
1397 whisking and passive whisker stimulation. *Nat Commun* 13, 3830.



- 1398 Rizzolatti, G., Scandolara, C., Matelli, M., and Gentilucci, M. (1981). Afferent properties of periarculate neurons  
1399 in macaque monkeys. II. Visual responses. *Behav Brain Res* 2, 147-163.
- 1400 Shang, C., Liu, A., Li, D., Xie, Z., Chen, Z., Huang, M., Li, Y., Wang, Y., Shen, W.L., and Cao, P. (2019). A  
1401 subcortical excitatory circuit for sensory-triggered predatory hunting in mice. *Nat Neurosci* 22, 909-920.
- 1402 Sit, K.K., and Goard, M.J. (2020). Distributed and retinotopically asymmetric processing of coherent motion in  
1403 mouse visual cortex. *Nat Commun* 11, 3565.
- 1404 Sofroniew, N.J., and Svoboda, K. (2015). Whisking. *Curr Biol* 25, R137-140.
- 1405 Stark, A.W., Wong, E., Babovsky, H., and Kowarschik, R. (2019). Subjective speckle suppression for 3D  
1406 measurement using one-dimensional numerical filtering. *Appl Opt* 58, 9473-9483.
- 1407 Sugihara, T., Diltz, M.D., Averbeck, B.B., and Romanski, L.M. (2006). Integration of auditory and visual  
1408 communication information in the primate ventrolateral prefrontal cortex. *J Neurosci* 26, 11138-11147.
- 1409 Teichert, M., and Bolz, J. (2017). Simultaneous intrinsic signal imaging of auditory and visual cortex reveals  
1410 profound effects of acute hearing loss on visual processing. *Neuroimage* 159, 459-472.
- 1411 Teichert, M., and Bolz, J. (2018). How Senses Work Together: Cross-Modal Interactions between Primary Sensory  
1412 Cortices. *Neural Plast* 2018, 5380921.
- 1413 Teichert, M., Liebmann, L., Hubner, C.A., and Bolz, J. (2017). Homeostatic plasticity and synaptic scaling in the  
1414 adult mouse auditory cortex. *Sci Rep* 7, 17423.
- 1415 Tervo, D.G., Hwang, B.Y., Viswanathan, S., Gaj, T., Lavzin, M., Ritola, K.D., Lindo, S., Michael, S., Kuleshova,  
1416 E., Ojala, D., *et al.* (2016). A Designer AAV Variant Permits Efficient Retrograde Access to Projection Neurons.  
1417 *Neuron* 92, 372-382.
- 1418 Tremblay, R., Lee, S., and Rudy, B. (2016). GABAergic Interneurons in the Neocortex: From Cellular Properties  
1419 to Circuits. *Neuron* 91, 260-292.
- 1420 Tsodyks, M., Pawelzik, K., and Markram, H. (1998). Neural networks with dynamic synapses. *Neural Comput* 10,  
1421 821-835.
- 1422 Tsodyks, M.V., Skaggs, W.E., Sejnowski, T.J., and McNaughton, B.L. (1997). Paradoxical effects of external  
1423 modulation of inhibitory interneurons. *J Neurosci* 17, 4382-4388.
- 1424 Tyson, A.L., Rousseau, C.V., Niedworok, C.J., Keshavarzi, S., Tsitoura, C., Cossell, L., Strom, M., and Margrie,  
1425 T.W. (2021). A deep learning algorithm for 3D cell detection in whole mouse brain image datasets. *Plos*  
1426 *Computational Biology* 17.
- 1427 Tyson, A.L., Velez-Fort, M., Rousseau, C.V., Cossell, L., Tsitoura, C., Lenzi, S.C., Obenaus, H.A., Claudi, F.,  
1428 Branco, T., and Margrie, T.W. (2022). Accurate determination of marker location within whole-brain microscopy  
1429 images. *Sci Rep-Uk* 12.
- 1430 Van der Loos, H., and Woolsey, T.A. (1973). Somatosensory cortex: structural alterations following early injury  
1431 to sense organs. *Science* 179, 395-398.
- 1432 Velez-Fort, M., Bracey, E.F., Keshavarzi, S., Rousseau, C.V., Cossell, L., Lenzi, S.C., Strom, M., and Margrie,  
1433 T.W. (2018). A Circuit for Integration of Head- and Visual-Motion Signals in Layer 6 of Mouse Primary Visual  
1434 Cortex. *Neuron* 98, 179-191 e176.
- 1435 Velez-Fort, M., Rousseau, C.V., Niedworok, C.J., Wickersham, I.R., Rancz, E.A., Brown, A.P.Y., Strom, M., and  
1436 Margrie, T.W. (2014). The Stimulus Selectivity and Connectivity of Layer Six Principal Cells Reveals Cortical  
1437 Microcircuits Underlying Visual Processing. *Neuron* 84, 238.
- 1438 Wagor, E., Mangini, N.J., and Pearlman, A.L. (1980). Retinotopic organization of striate and extrastriate visual  
1439 cortex in the mouse. *J Comp Neurol* 193, 187-202.
- 1440 Wallace, M.T., Ramachandran, R., and Stein, B.E. (2004). A revised view of sensory cortical parcellation. *Proc*  
1441 *Natl Acad Sci U S A* 101, 2167-2172.
- 1442 Wang, Q.X., Ding, S.L., Li, Y., Royall, J., Feng, D., Lesnar, P., Graddis, N., Naeemi, M., Facer, B., Ho, A., *et al.*  
1443 (2020). The Allen Mouse Brain Common Coordinate Framework: A 3D Reference Atlas. *Cell* 181, 936-+.
- 1444 Weiler, S., Bauer, J., Hubener, M., Bonhoeffer, T., Rose, T., and Scheuss, V. (2018). High-yield in vitro recordings  
1445 from neurons functionally characterized in vivo. *Nat Protoc* 13, 1275-1293.
- 1446 Wertz, A., Trenholm, S., Yonehara, K., Hillier, D., Raics, Z., Leinweber, M., Szalay, G., Ghanem, A., Keller, G.,  
1447 Rozsa, B., *et al.* (2015). Single-cell-initiated monosynaptic tracing reveals layer-specific cortical network modules.  
1448 *Science* 349, 70-74.
- 1449 Wilson, H.R., and Cowan, J.D. (1972). Excitatory and inhibitory interactions in localized populations of model  
1450 neurons. *Biophys J* 12, 1-24.
- 1451 Zhang, Z.W., and Deschenes, M. (1997). Intracortical axonal projections of lamina VI cells of the primary  
1452 somatosensory cortex in the rat: a single-cell labeling study. *J Neurosci* 17, 6365-6379.
- 1453 Zhuang, J., Ng, L., Williams, D., Valley, M., Li, Y., Garrett, M., and Waters, J. (2017). An extended retinotopic  
1454 map of mouse cortex. *Elife* 6.
- 1455 Zingg, B., Chou, X.L., Zhang, Z.G., Mesik, L., Liang, F., Tao, H.W., and Zhang, L.I. (2017). AAV-Mediated  
1456 Anterograde Transsynaptic Tagging: Mapping Corticocollicular Input-Defined Neural Pathways for Defense  
1457 Behaviors. *Neuron* 93, 33-47.

1458 **6 Acknowledgements**

1459 We thank Michael Richter and Elisabeth Meier for excellent for technical support and technical  
1460 assistance. The authors are further grateful to the support staff of the Neurobiological Research Facility  
1461 at Sainsbury Wellcome Centre.

1462

1463 This project is supported by the Interdisciplinary Centre for Clinical Research (IZKF; Advance medical  
1464 scientist - Program 11) and by funding from the Foundation “Else Kröner-Fresenius-Stiftung” within  
1465 the Else Kröner Graduate School for Medical Students “Jena School for Aging Medicine” (JSAM).  
1466 T.W.M. and S.W. are funded by The Wellcome Trust (214333/Z/18/Z; 090843/F/09/Z) and Humboldt  
1467 Foundation (S.W.). K.H. is funded by the German Research Foundation (HO 2156/5-1, HO 2156/6-1).  
1468 A.S. and C.F. are funded by the German Federal Ministry for Economic Affairs and Climate Action  
1469 (BMWK) within the Promotion of Joint Industrial Research Programme (IGF) due to a decision of the  
1470 German Bundestag as part of the research project (IGF 22462 BR) by the Association for Research in  
1471 Precision Mechanics, Optics and Medical Technology (F.O.M.) under the auspices of the German  
1472 Federation of Industrial Research Associations (AiF). C.G. is funded by the German Research  
1473 Foundation (FOR3004; GE 2519/8-1; GE 2519/9-1).

1474

1475 **7 Declaration of interest**

1476 The authors declare no competing interests.

1477

1478 **8 Author contributions**

1479 S.W. conceived the project, performed tracing and electrophysiological experiments, analyzed  
1480 electrophysiological experiments, interpreted all data and wrote the manuscript. V.R. contributed to the  
1481 analysis of tracing data, performed network modeling and wrote the manuscript. J.W. generated,  
1482 animated and analyzed the model of the mouse whisker array. M.I. performed imaging experiments and  
1483 immunohistological stainings. A.W.S. contributed to the generation of the model of the mouse whisker  
1484 array. C.F., C.G. and O.W.W. provided resources and interpreted data. M.H. interpreted data and wrote  
1485 the manuscript. J.B. supervised imaging experiments and imaging data analysis, interpreted data and  
1486 wrote the manuscript. T.M. and K.H. supervised the project and wrote the manuscript. M.T. designed  
1487 the experiments, analyzed and interpreted the majority of data, supervised the project and wrote the first  
1488 draft of the manuscript.
